# Supplementary material for: Bacterial Communities in Women with Bacterial Vaginosis: High Resolution Phylogenetic Analyses Reveal Relationships of Microbiota to Clinical Criteria
Source: PLoS One. 2012 Jun 18;7(6):e37818. doi: 10.1371/journal.pone.0037818 (PMC3377712; doi:10.1371/journal.pone.0037818)

# Nugent score (0–6; 7–10)

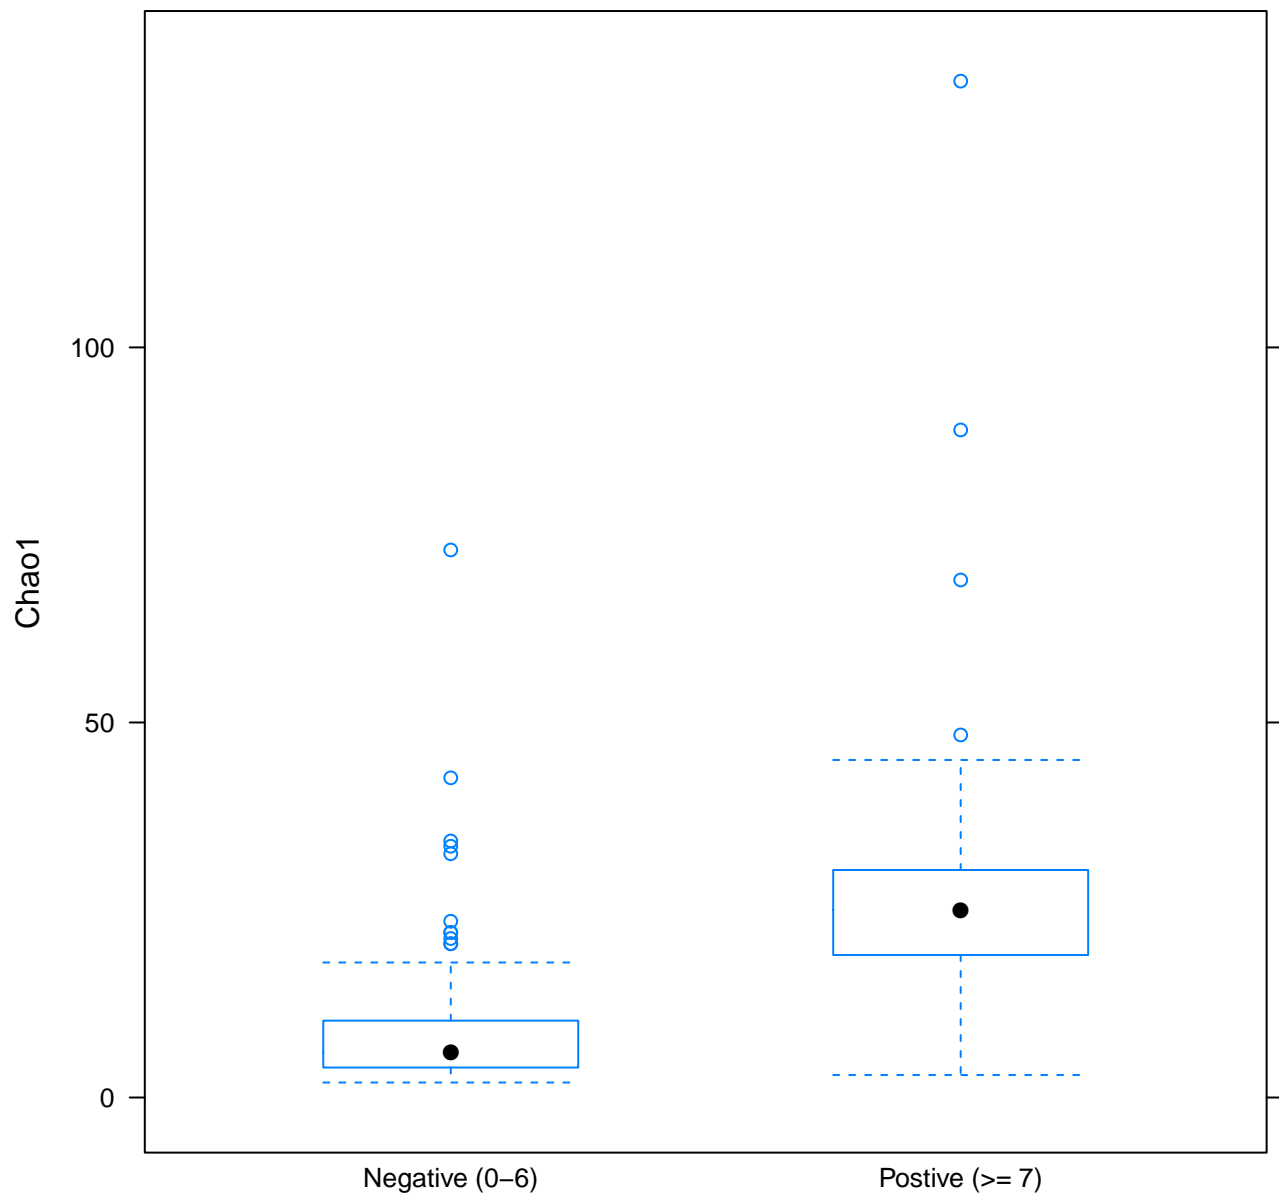

# Nugent score (0–3; 4–6; 7–10)

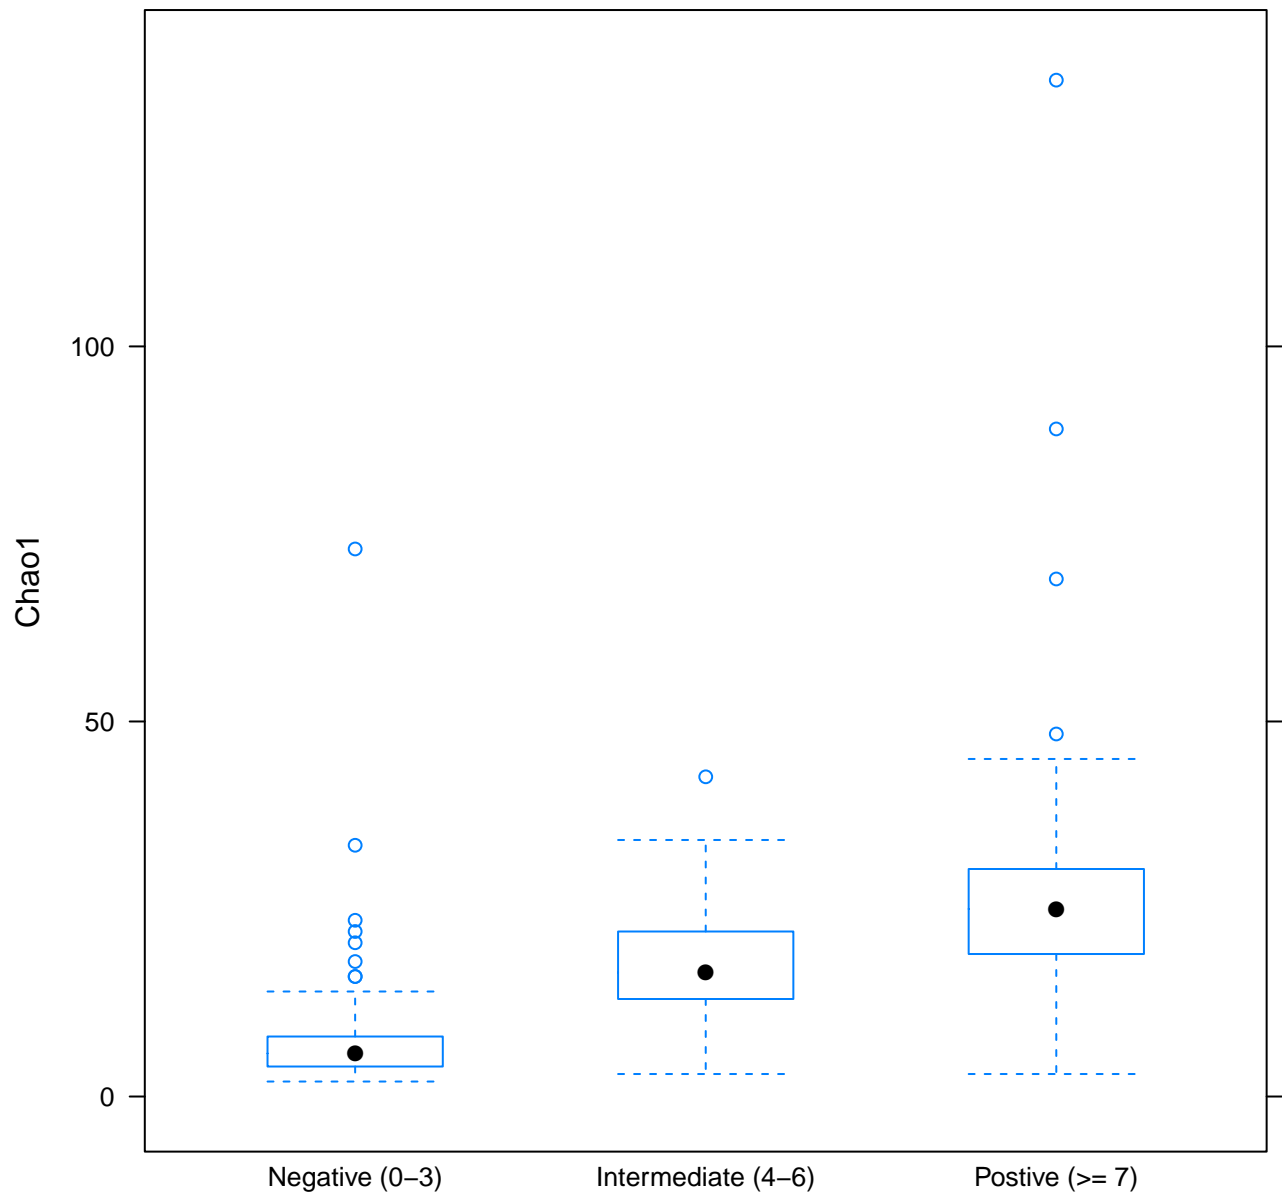

# Amsel's clinical criteria

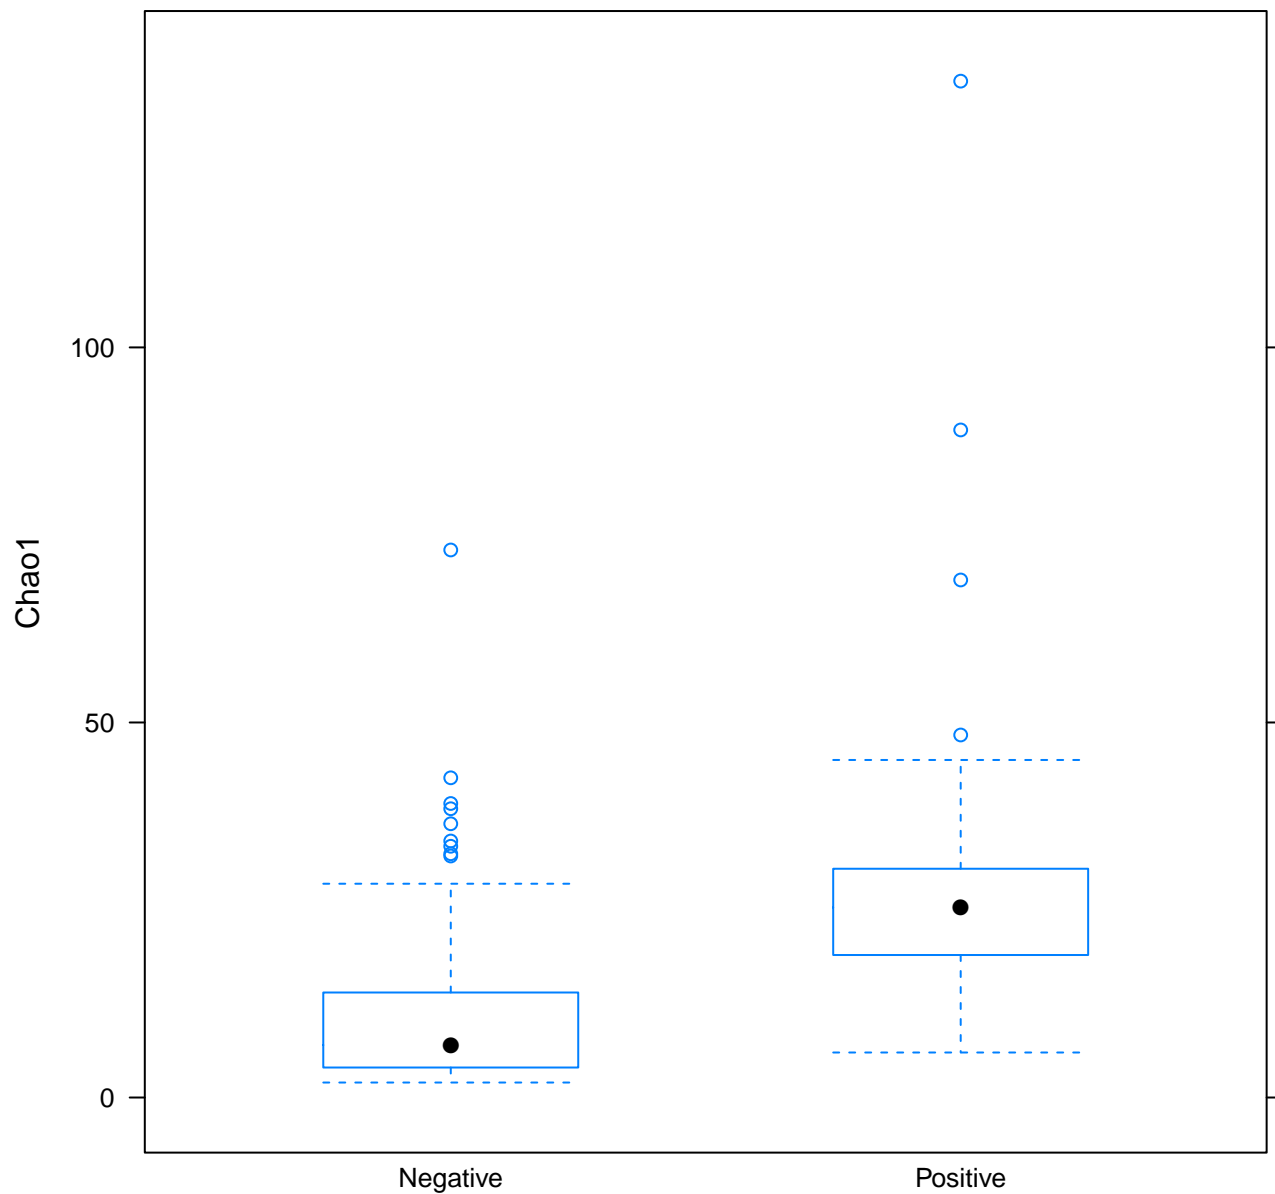

pH

Amsel's clinical criteria

Negative ●  
Positive ●

100

Chao1

50

0

4.0

4.5

5.0

5.5

6.0

pH

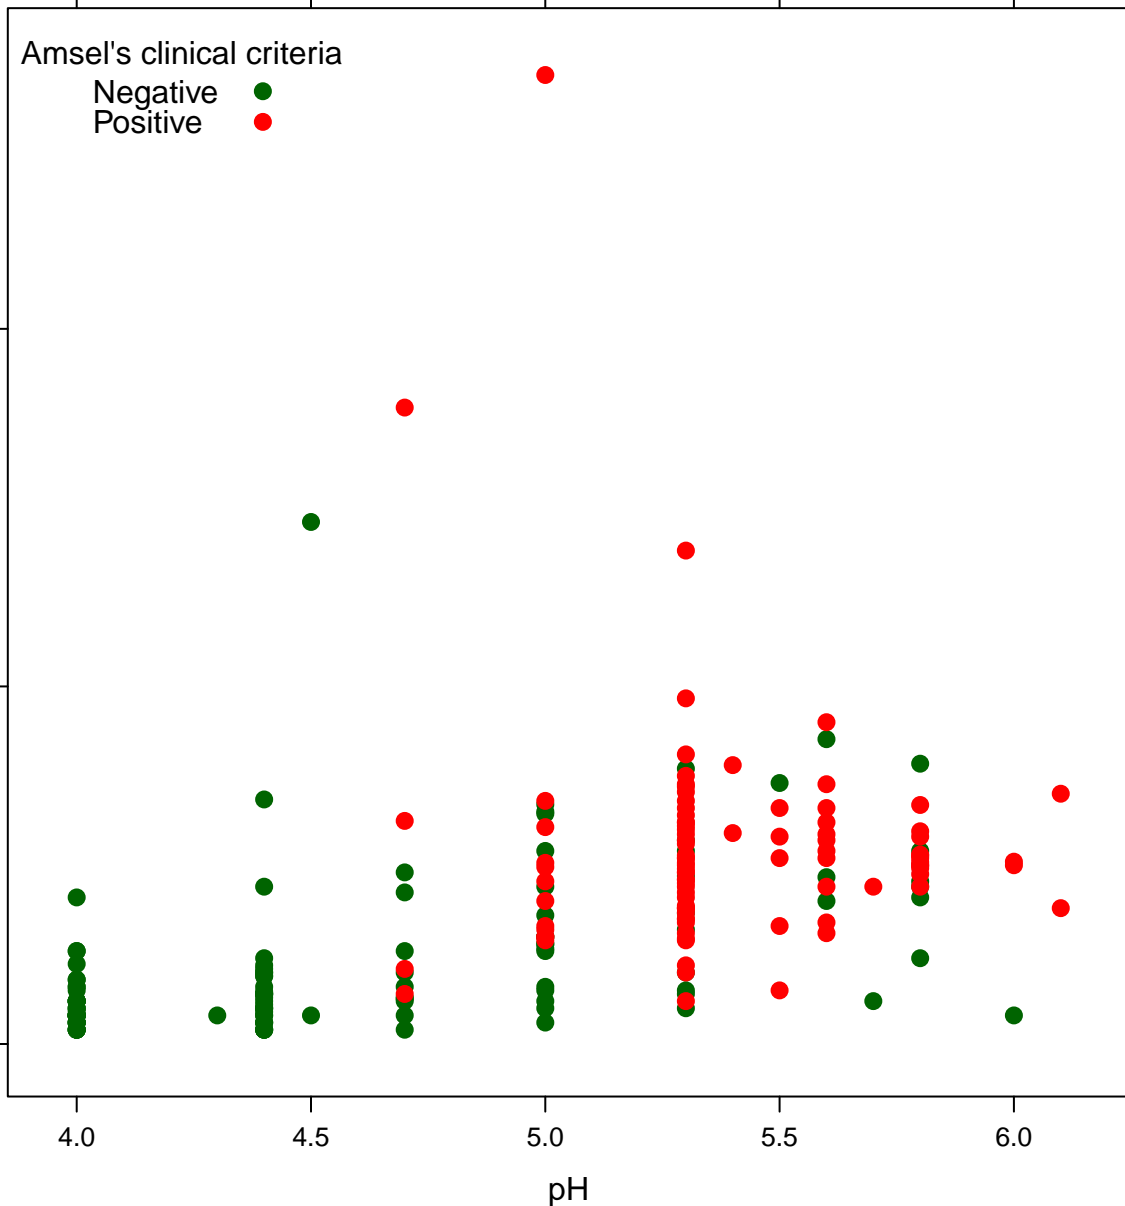

# Whiff test

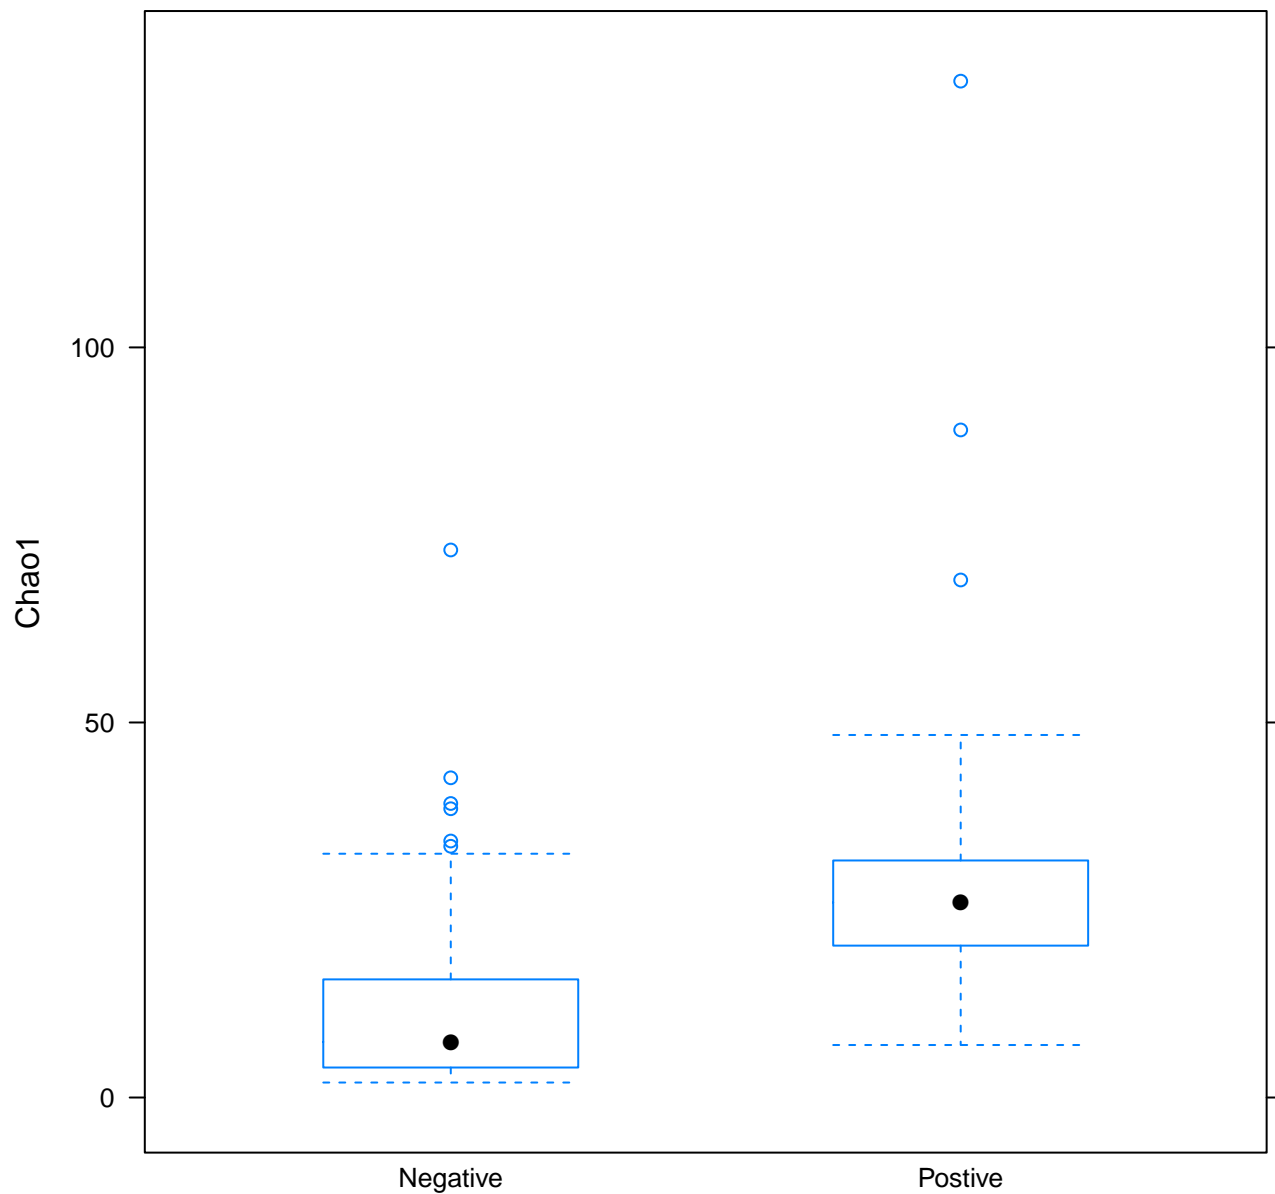

## Clue cells

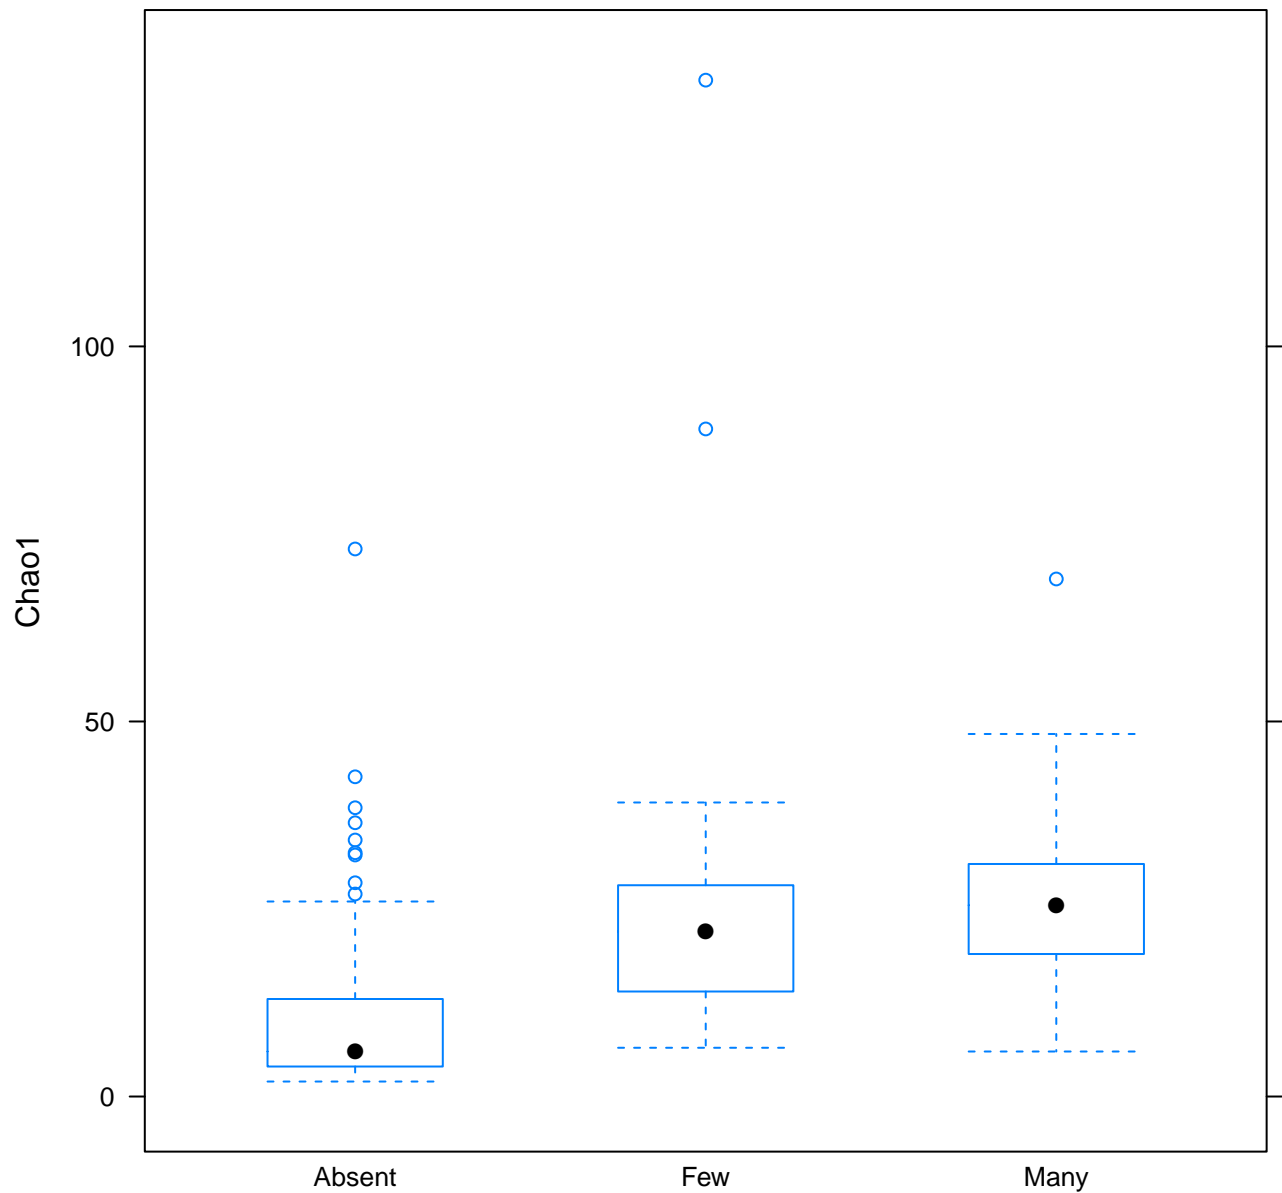

# Vaginal discharge

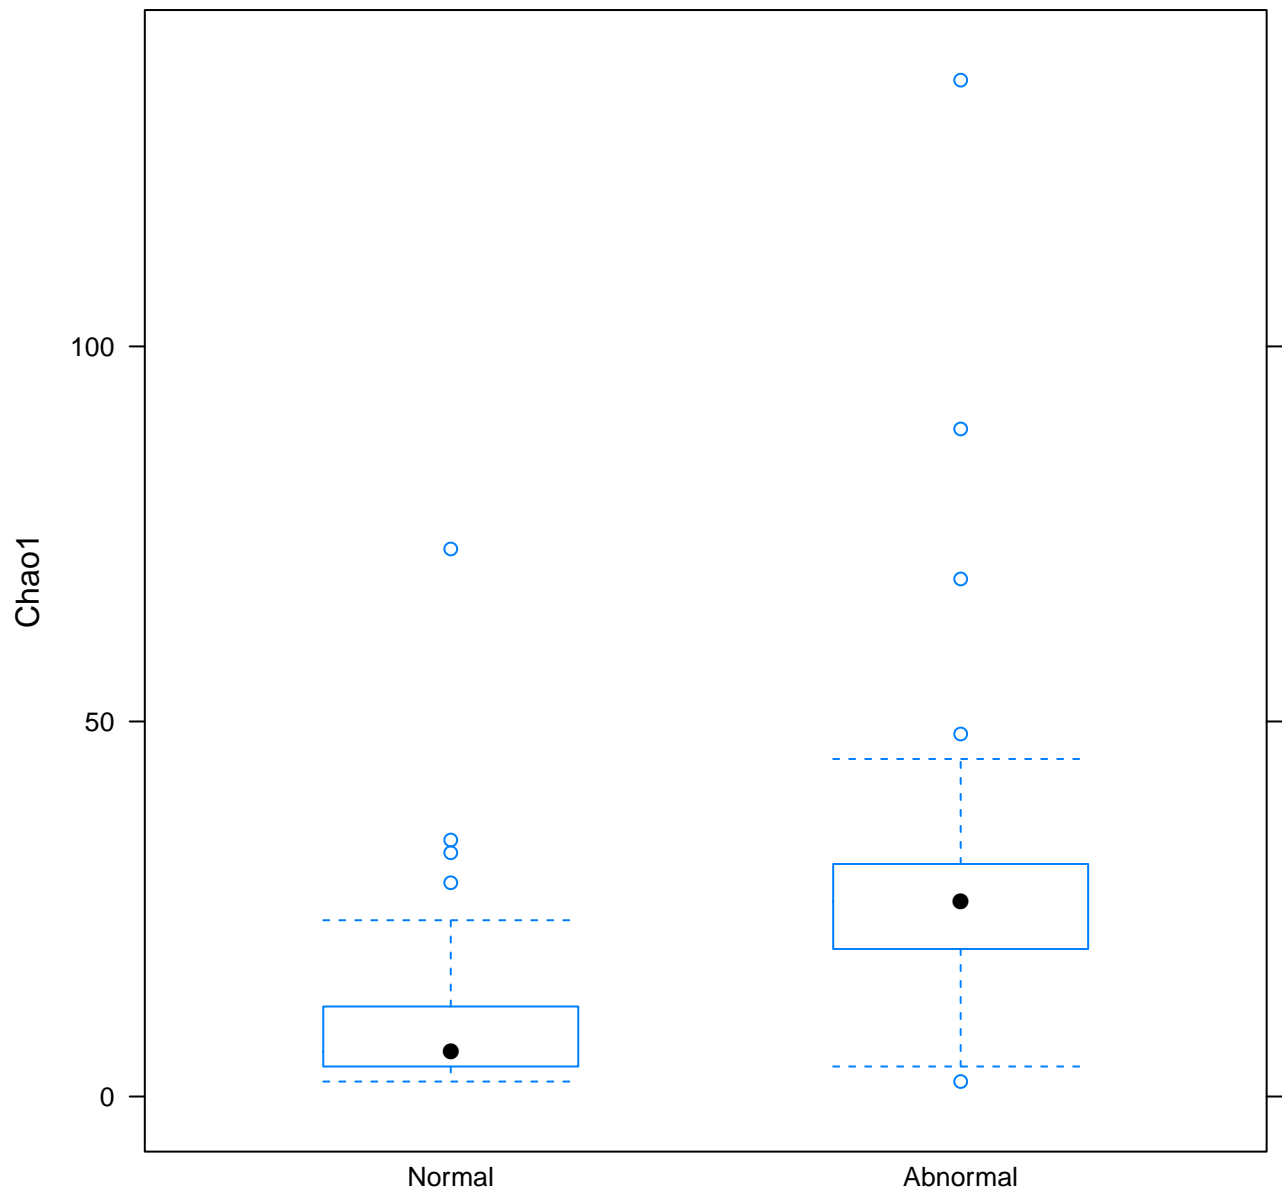

# Nugent score (0–6; 7–10)

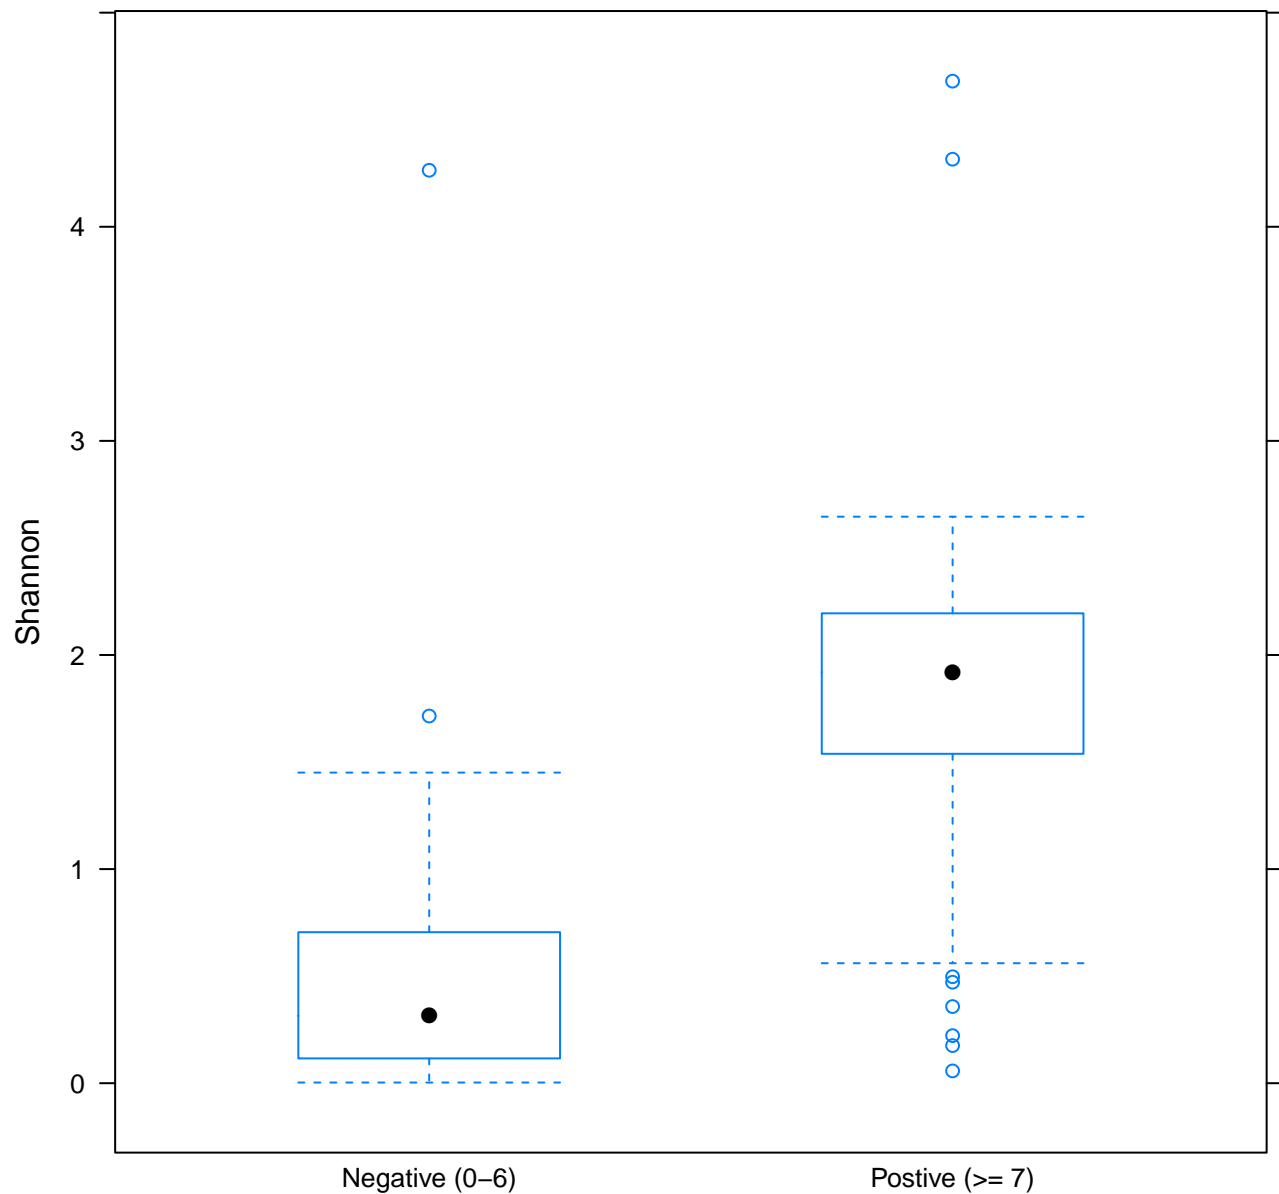

# Nugent score (0–3; 4–6; 7–10)

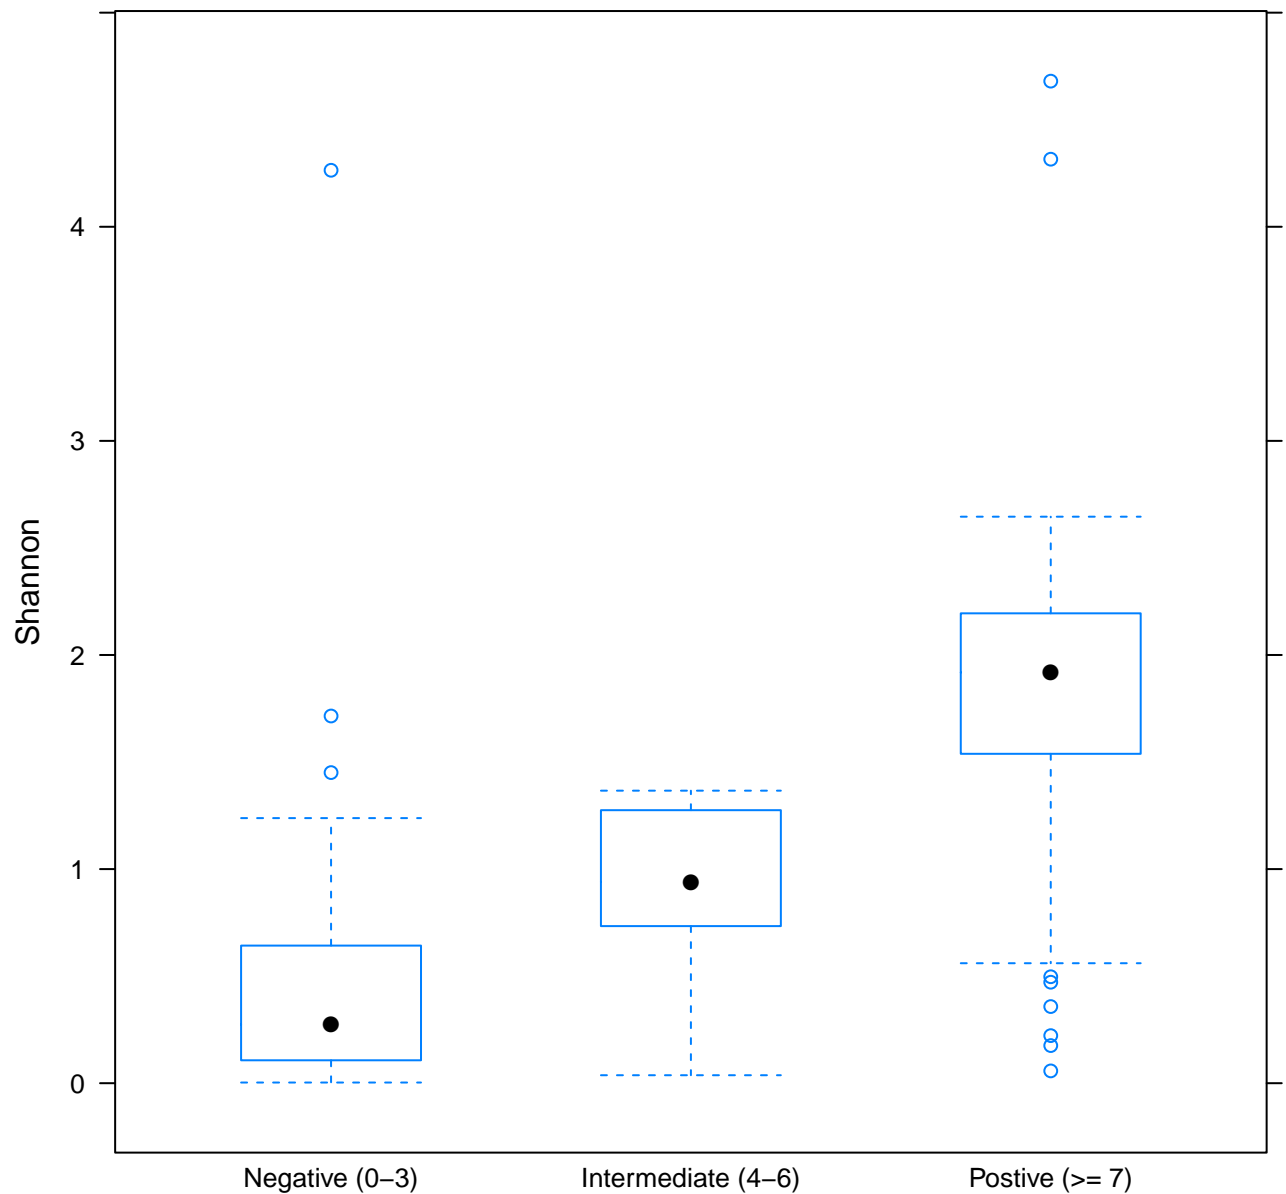

# Amsel's clinical criteria

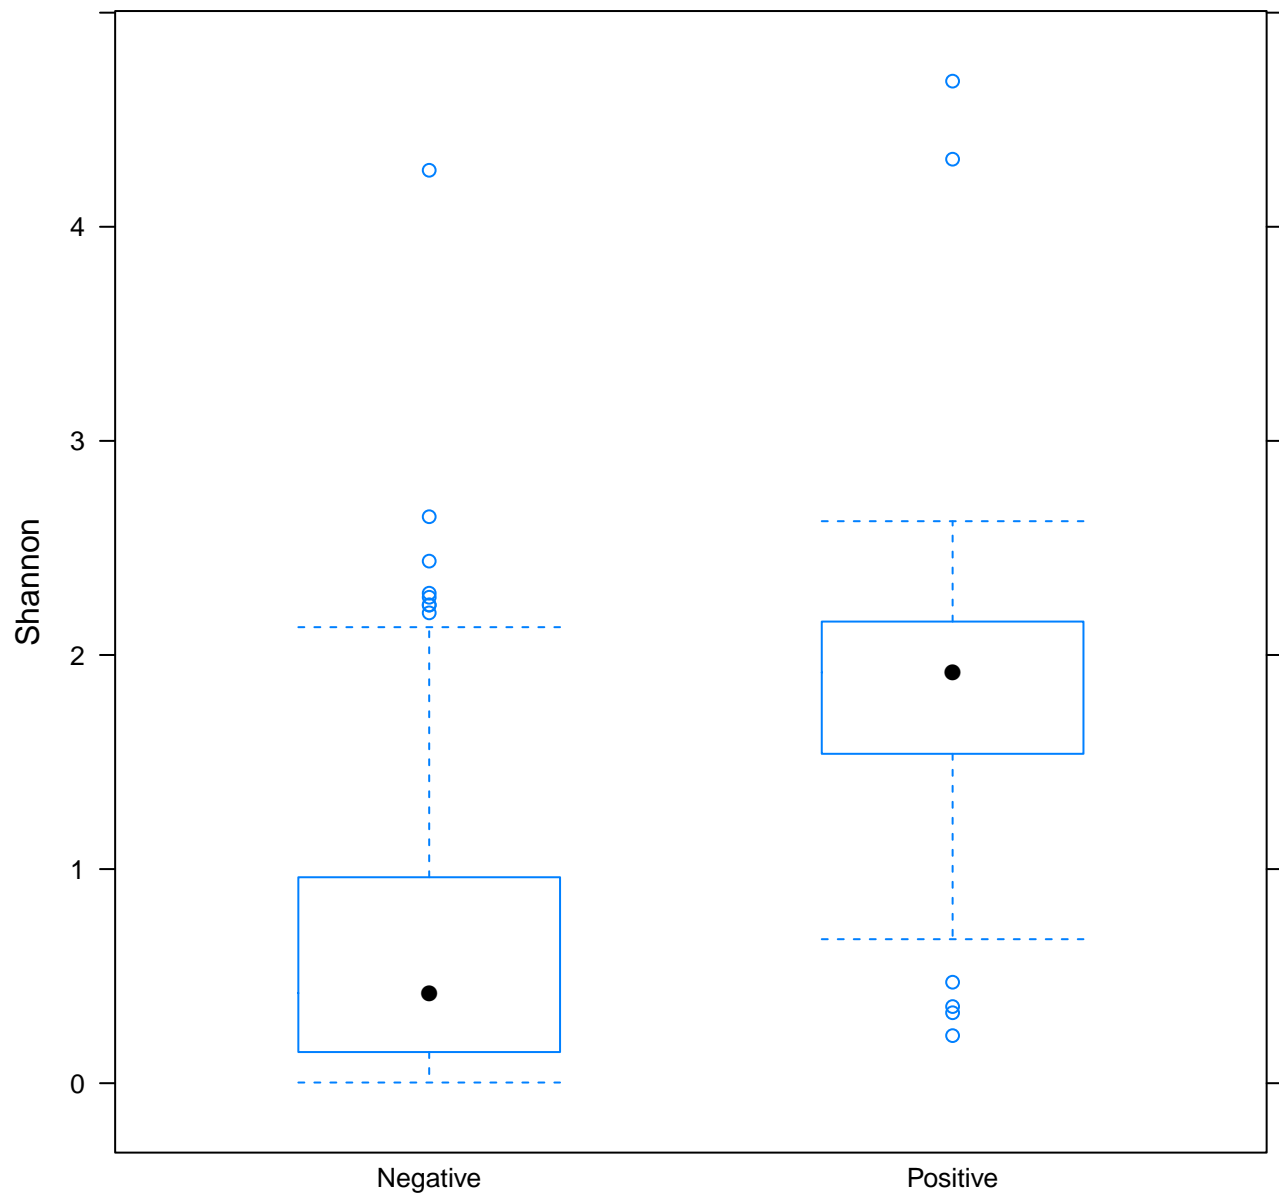

pH

Negative ●

## Positive

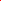

3

6

•

1

0

## 4.5

## 5.5

6.C

pH

# Whiff test

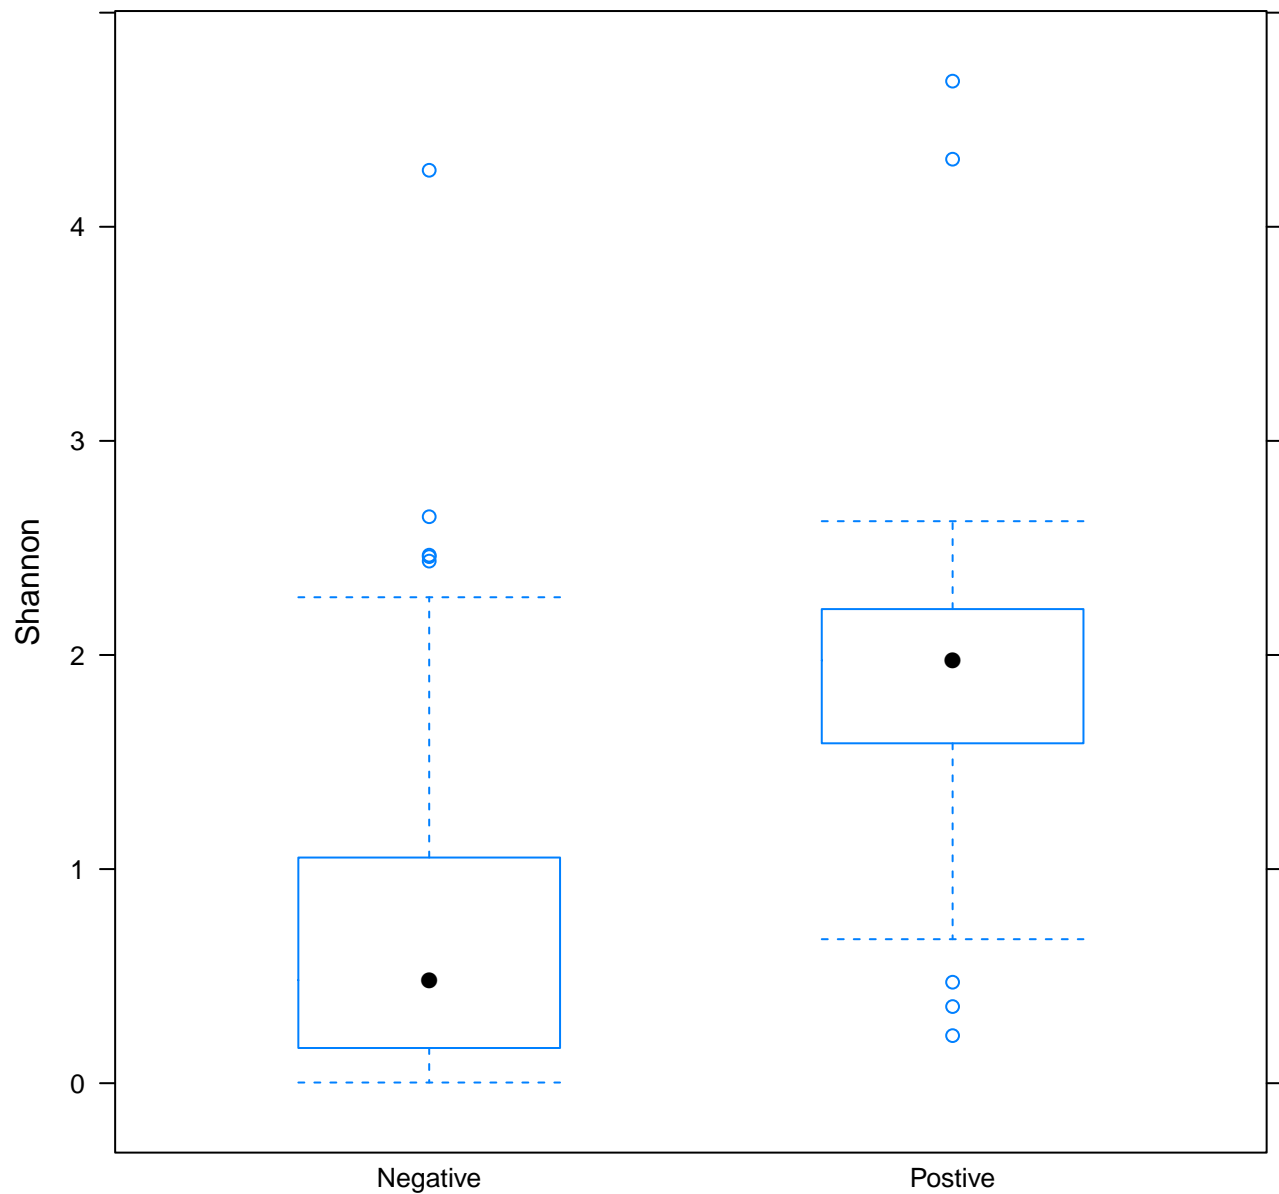

# Clue cells

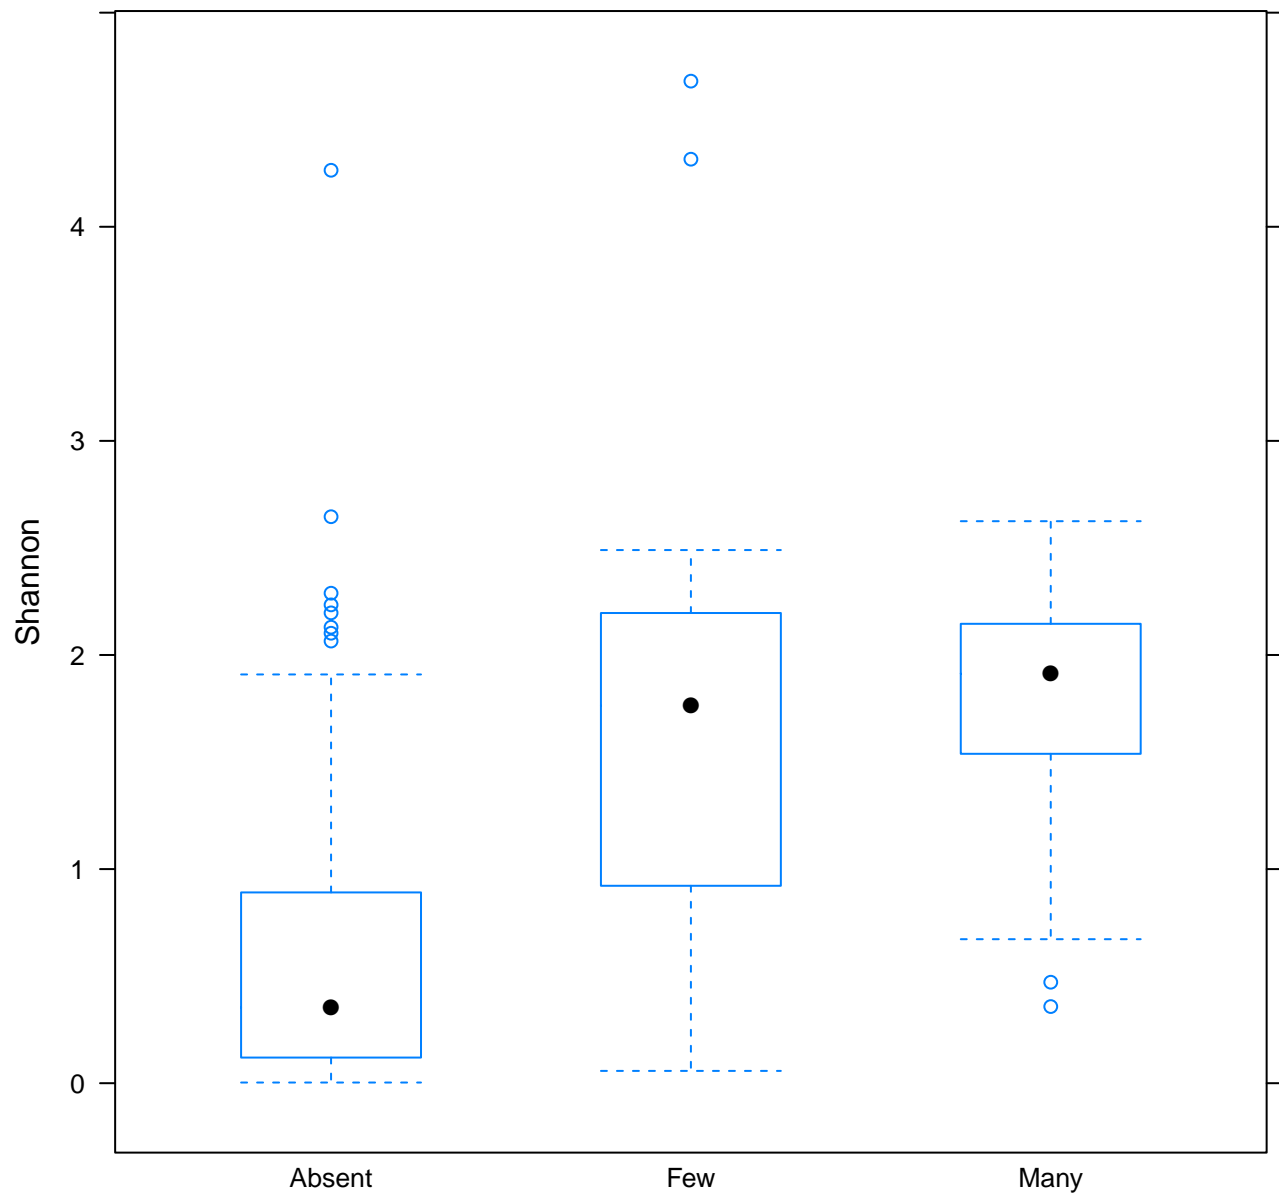

# Vaginal discharge

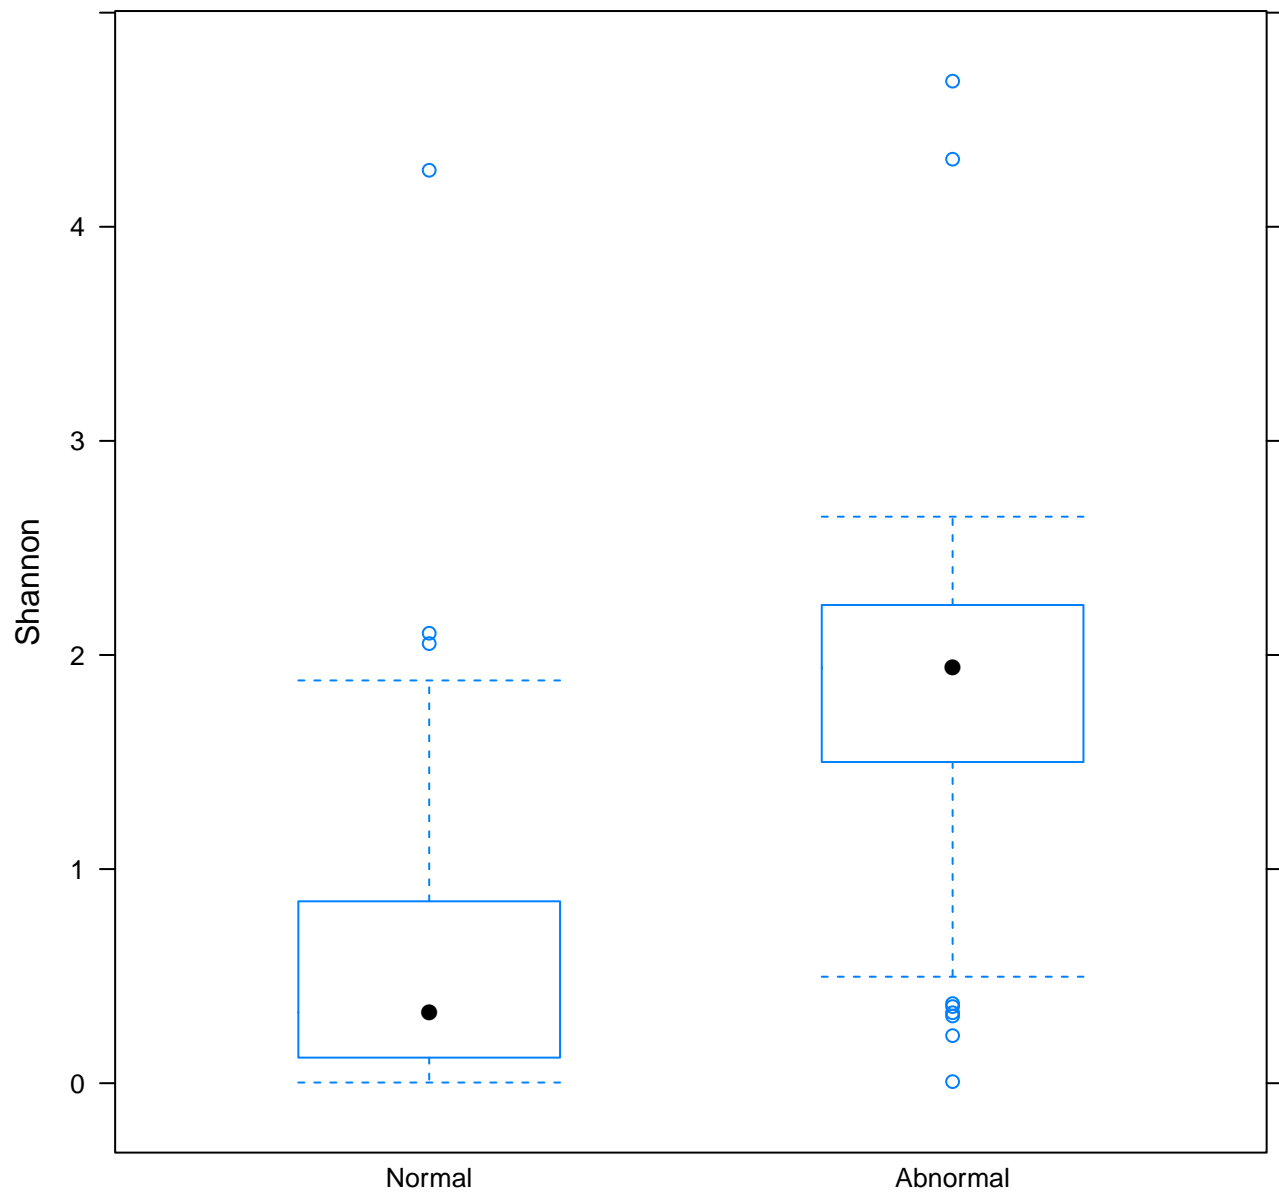

Supplement: Figure S2 — Descriptive Statistics. Chao 1 plots comparing species richness and Shannon plots comparing species diversity. Chao Plot 1 (Nugent Score; 0–6 and 7–10): BV is characterized by greater species richness. Chao Plot 2 (Nugent Score; 0–3, 4–6 and 7–10): The median numbers of taxa are similar between those who have Intermediate flora and frank BV. Chao Plot 3 (Amsel’s clinical criteria): Women who are diagnosed for BV by Amsel’s clinical criteria have greater numbers of taxa than those who don’t have BV. Chao Plot 4 (Amsel’s criteria – pH): Higher pH is typically associated with increased species richness. Chao Plot 5 (Amsel’s criteria – Whiff test): Vaginal samples that have an amine odor upon addition of potassium hydroxide are characterized by increased species richness. Chao Plot 6 (Amsel’s criteria – Clue cells): Vaginal samples that have <20% clue cells have similar numbers of taxa when compared to those who have >20% clue cells. Chao Plot 7 (Amsel’s criteria – Vaginal discharge): Women with abnormal vaginal discharge are typically colonized with greater numbers of taxa than those with normal vaginal discharge. Shannon Plot 1 (Nugent Score; 0–6 and 7–10): BV is characterized by increased species diversity. Shannon Plot 2 (Nugent Score; 0–3, 4–6 and 7–10): There is greater species diversity in those who have Intermediate flora (4–6) and frank BV (7–10) when compared with women without BV (0–3). Shannon Plot 3 (Amsel’s clinical criteria): Women who are diagnosed for BV by Amsel’s clinical criteria have greater species diversity than those who don’t have BV. Shannon Plot 4 (Amsel’s criteria – pH): Higher pH is typically associated with increased species diversity. All women with a pH of 4.5 and less were BV negative. Shannon Plot 5 (Amsel’s criteria – Whiff test): Vaginal samples that have an amine odor upon addition of potassium hydroxide are characterized by increased species diversity. Shannon Plot 6 (Amsel’s criteria – Clue cells): Vaginal samples that have clue ce [file pone.0037818.s002.pdf]
