# Supplementary material for: Bacterial Communities in Women with Bacterial Vaginosis: High Resolution Phylogenetic Analyses Reveal Relationships of Microbiota to Clinical Criteria
Source: PLoS One. 2012 Jun 18;7(6):e37818. doi: 10.1371/journal.pone.0037818 (PMC3377712; doi:10.1371/journal.pone.0037818)
Supplement: Table S1 — List of pyrosequencing primers. (XLSX) [file pone.0037818.s004.xlsx]

## Sheet: FLX pyro primers
FLX 454 primers containing error correcting bar codes & linker bases
5’-Fusion primer- linker bases- 16S bacterial primer-3’
5’-Fusion primer- BARCODE-linker bases- 16S bacterial primer-3’
Primer Name	FLX 454 full primer sequence	FLX 454 adapter sequence	Barcode	Linker	16S rRNA gene primer
FLX Pyro-338F1	GCCTCCCTCGCGCCATCAG GC ACTCCTRCGGGAGGCAGCAG	GCCTCCCTCGCGCCATCAG		GC	ACTCCTRCGGGAGGCAGCAG
FLX Pyro-338F2	GCCTCCCTCGCGCCATCAG GC ACACCTACGGTGGCTGC	GCCTCCCTCGCGCCATCAG		GC	ACACCTACGGGTGGCTGC
FLX Pyro-338F3	GCCTCCCTCGCGCCATCAG GC ACACCTACGGGTGGCAGC	GCCTCCCTCGCGCCATCAG		GC	ACACCTACGGGTGGCAGC
FLX Pyro-R1	GCCTTGCCAGCCCGCTCAG AACCAACC GC GGACTACCVGGGTATCTAAT	GCCTTGCCAGCCCGCTCAG	AACCAACC	GC	GGACTACCVGGGTATCTAAT
FLX Pyro-R2	GCCTTGCCAGCCCGCTCAG AACCAAGG GC GGACTACCVGGGTATCTAAT	GCCTTGCCAGCCCGCTCAG	AACCAAGG	GC	GGACTACCVGGGTATCTAAT
FLX Pyro-R3	GCCTTGCCAGCCCGCTCAG AACCATCG GC GGACTACCVGGGTATCTAAT	GCCTTGCCAGCCCGCTCAG	AACCATCG	GC	GGACTACCVGGGTATCTAAT
FLX Pyro-R4	GCCTTGCCAGCCCGCTCAG AACCATGC GC GGACTACCVGGGTATCTAAT	GCCTTGCCAGCCCGCTCAG	AACCATGC	GC	GGACTACCVGGGTATCTAAT
FLX Pyro-R5	GCCTTGCCAGCCCGCTCAG AACCGCAT GC GGACTACCVGGGTATCTAAT	GCCTTGCCAGCCCGCTCAG	AACCGCAT	GC	GGACTACCVGGGTATCTAAT
FLX Pyro-R6	GCCTTGCCAGCCCGCTCAG AACCGCTA GC GGACTACCVGGGTATCTAAT	GCCTTGCCAGCCCGCTCAG	AACCGCTA	GC	GGACTACCVGGGTATCTAAT
FLX Pyro-R7	GCCTTGCCAGCCCGCTCAG AACCGGAA GC GGACTACCVGGGTATCTAAT	GCCTTGCCAGCCCGCTCAG	AACCGGAA	GC	GGACTACCVGGGTATCTAAT
FLX Pyro-R8	GCCTTGCCAGCCCGCTCAG AACCGGTT GC GGACTACCVGGGTATCTAAT	GCCTTGCCAGCCCGCTCAG	AACCGGTT	GC	GGACTACCVGGGTATCTAAT
FLX Pyro-R9	GCCTTGCCAGCCCGCTCAG AACCTACG GC GGACTACCVGGGTATCTAAT	GCCTTGCCAGCCCGCTCAG	AACCTACG	GC	GGACTACCVGGGTATCTAAT
FLX Pyro-R10	GCCTTGCCAGCCCGCTCAG AACCTAGC GC GGACTACCVGGGTATCTAAT	GCCTTGCCAGCCCGCTCAG	AACCTAGC	GC	GGACTACCVGGGTATCTAAT
FLX Pyro-R11	GCCTTGCCAGCCCGCTCAG AACCTTCC GC GGACTACCVGGGTATCTAAT	GCCTTGCCAGCCCGCTCAG	AACCTTCC	GC	GGACTACCVGGGTATCTAAT
FLX Pyro-R12	GCCTTGCCAGCCCGCTCAG AACCTTGG GC GGACTACCVGGGTATCTAAT	GCCTTGCCAGCCCGCTCAG	AACCTTGG	GC	GGACTACCVGGGTATCTAAT
FLX Pyro-R13	GCCTTGCCAGCCCGCTCAG AACGAACG GC GGACTACCVGGGTATCTAAT	GCCTTGCCAGCCCGCTCAG	AACGAACG	GC	GGACTACCVGGGTATCTAAT
FLX Pyro-R14	GCCTTGCCAGCCCGCTCAG AACGAAGC GC GGACTACCVGGGTATCTAAT	GCCTTGCCAGCCCGCTCAG	AACGAAGC	GC	GGACTACCVGGGTATCTAAT
FLX Pyro-R15	GCCTTGCCAGCCCGCTCAG AACGATCC GC GGACTACCVGGGTATCTAAT	GCCTTGCCAGCCCGCTCAG	AACGATCC	GC	GGACTACCVGGGTATCTAAT
FLX Pyro-R16	GCCTTGCCAGCCCGCTCAG AACGATGG GC GGACTACCVGGGTATCTAAT	GCCTTGCCAGCCCGCTCAG	AACGATGG	GC	GGACTACCVGGGTATCTAAT
FLX Pyro-R17	GCCTTGCCAGCCCGCTCAG AACGCCAT GC GGACTACCVGGGTATCTAAT	GCCTTGCCAGCCCGCTCAG	AACGCCAT	GC	GGACTACCVGGGTATCTAAT
FLX Pyro-R18	GCCTTGCCAGCCCGCTCAG AACGCCTA GC GGACTACCVGGGTATCTAAT	GCCTTGCCAGCCCGCTCAG	AACGCCTA	GC	GGACTACCVGGGTATCTAAT
FLX Pyro-R19	GCCTTGCCAGCCCGCTCAG AACGCGAA GC GGACTACCVGGGTATCTAAT	GCCTTGCCAGCCCGCTCAG	AACGCGAA	GC	GGACTACCVGGGTATCTAAT
FLX Pyro-R21	GCCTTGCCAGCCCGCTCAG AACGGCAA GC GGACTACCVGGGTATCTAAT	GCCTTGCCAGCCCGCTCAG	AACGGCAA	GC	GGACTACCVGGGTATCTAAT
FLX Pyro-R22	GCCTTGCCAGCCCGCTCAG AACGGCTT GC GGACTACCVGGGTATCTAAT	GCCTTGCCAGCCCGCTCAG	AACGGCTT	GC	GGACTACCVGGGTATCTAAT
FLX Pyro-R23	GCCTTGCCAGCCCGCTCAG AACGTACC GC GGACTACCVGGGTATCTAAT	GCCTTGCCAGCCCGCTCAG	AACGTACC	GC	GGACTACCVGGGTATCTAAT
FLX Pyro-R24	GCCTTGCCAGCCCGCTCAG AACGTAGG GC GGACTACCVGGGTATCTAAT	GCCTTGCCAGCCCGCTCAG	AACGTAGG	GC	GGACTACCVGGGTATCTAAT
FLX Pyro-R25	GCCTTGCCAGCCCGCTCAG AACGTTCG GC GGACTACCVGGGTATCTAAT	GCCTTGCCAGCCCGCTCAG	AACGTTCG	GC	GGACTACCVGGGTATCTAAT
FLX Pyro-R26	GCCTTGCCAGCCCGCTCAG AACGTTGC GC GGACTACCVGGGTATCTAAT	GCCTTGCCAGCCCGCTCAG	AACGTTGC	GC	GGACTACCVGGGTATCTAAT
FLX Pyro-R27	GCCTTGCCAGCCCGCTCAG AAGCAACG GC GGACTACCVGGGTATCTAAT	GCCTTGCCAGCCCGCTCAG	AAGCAACG	GC	GGACTACCVGGGTATCTAAT
FLX Pyro-R28	GCCTTGCCAGCCCGCTCAG AAGCAAGC GC GGACTACCVGGGTATCTAAT	GCCTTGCCAGCCCGCTCAG	AAGCAAGC	GC	GGACTACCVGGGTATCTAAT
FLX Pyro-R29	GCCTTGCCAGCCCGCTCAG AAGCATCC GC GGACTACCVGGGTATCTAAT	GCCTTGCCAGCCCGCTCAG	AAGCATCC	GC	GGACTACCVGGGTATCTAAT
FLX Pyro-R30	GCCTTGCCAGCCCGCTCAG AAGCATGG GC GGACTACCVGGGTATCTAAT	GCCTTGCCAGCCCGCTCAG	AAGCATGG	GC	GGACTACCVGGGTATCTAAT
FLX Pyro-R31	GCCTTGCCAGCCCGCTCAG AAGCCGAA GC GGACTACCVGGGTATCTAAT	GCCTTGCCAGCCCGCTCAG	AAGCCGAA	GC	GGACTACCVGGGTATCTAAT
FLX Pyro-R32	GCCTTGCCAGCCCGCTCAG AAGCCGTT GC GGACTACCVGGGTATCTAAT	GCCTTGCCAGCCCGCTCAG	AAGCCGTT	GC	GGACTACCVGGGTATCTAAT
FLX Pyro-R33	GCCTTGCCAGCCCGCTCAG AAGCGCAA GC GGACTACCVGGGTATCTAAT	GCCTTGCCAGCCCGCTCAG	AAGCGCAA	GC	GGACTACCVGGGTATCTAAT
FLX Pyro-R34	GCCTTGCCAGCCCGCTCAG AAGCGCTT GC GGACTACCVGGGTATCTAAT	GCCTTGCCAGCCCGCTCAG	AAGCGCTT	GC	GGACTACCVGGGTATCTAAT
FLX Pyro-R35	GCCTTGCCAGCCCGCTCAG AAGCGGAT GC GGACTACCVGGGTATCTAAT	GCCTTGCCAGCCCGCTCAG	AAGCGGAT	GC	GGACTACCVGGGTATCTAAT
FLX Pyro-R36	GCCTTGCCAGCCCGCTCAG AAGCGGTA GC GGACTACCVGGGTATCTAAT	GCCTTGCCAGCCCGCTCAG	AAGCGGTA	GC	GGACTACCVGGGTATCTAAT
FLX Pyro-R37	GCCTTGCCAGCCCGCTCAG AAGCTAGG GC GGACTACCVGGGTATCTAAT	GCCTTGCCAGCCCGCTCAG	AAGCTAGG	GC	GGACTACCVGGGTATCTAAT
FLX Pyro-R38	GCCTTGCCAGCCCGCTCAG AAGCTTCG GC GGACTACCVGGGTATCTAAT	GCCTTGCCAGCCCGCTCAG	AAGCTTCG	GC	GGACTACCVGGGTATCTAAT
FLX Pyro-R39	GCCTTGCCAGCCCGCTCAG AAGCTTGC GC GGACTACCVGGGTATCTAAT	GCCTTGCCAGCCCGCTCAG	AAGCTTGC	GC	GGACTACCVGGGTATCTAAT
FLX Pyro-R40	GCCTTGCCAGCCCGCTCAG AAGGAACC GC GGACTACCVGGGTATCTAAT	GCCTTGCCAGCCCGCTCAG	AAGGAACC	GC	GGACTACCVGGGTATCTAAT
FLX Pyro-R41	GCCTTGCCAGCCCGCTCAG AAGGAAGG GC GGACTACCVGGGTATCTAAT	GCCTTGCCAGCCCGCTCAG	AAGGAAGG	GC	GGACTACCVGGGTATCTAAT
FLX Pyro-R42	GCCTTGCCAGCCCGCTCAG AAGGATCG GC GGACTACCVGGGTATCTAAT	GCCTTGCCAGCCCGCTCAG	AAGGATCG	GC	GGACTACCVGGGTATCTAAT
FLX Pyro-R47	GCCTTGCCAGCCCGCTCAG AAGGCGTA GC GGACTACCVGGGTATCTAAT	GCCTTGCCAGCCCGCTCAG	AAGGCGTA	GC	GGACTACCVGGGTATCTAAT
FLX Pyro-R49	GCCTTGCCAGCCCGCTCAG AAGGTAGC GC GGACTACCVGGGTATCTAAT	GCCTTGCCAGCCCGCTCAG	AAGGTAGC	GC	GGACTACCVGGGTATCTAAT
FLX Pyro-R50	GCCTTGCCAGCCCGCTCAG AAGGTTCC GC GGACTACCVGGGTATCTAAT	GCCTTGCCAGCCCGCTCAG	AAGGTTCC	GC	GGACTACCVGGGTATCTAAT
FLX Pyro-R51	GCCTTGCCAGCCCGCTCAG AAGGTTGG GC GGACTACCVGGGTATCTAAT	GCCTTGCCAGCCCGCTCAG	AAGGTTGG	GC	GGACTACCVGGGTATCTAAT
FLX Pyro-R55	GCCTTGCCAGCCCGCTCAG AATAGGCG GC GGACTACCVGGGTATCTAAT	GCCTTGCCAGCCCGCTCAG	AATAGGCG	GC	GGACTACCVGGGTATCTAAT
FLX Pyro-R61	GCCTTGCCAGCCCGCTCAG ACACACAC GC GGACTACCVGGGTATCTAAT	GCCTTGCCAGCCCGCTCAG	ACACACAC	GC	GGACTACCVGGGTATCTAAT
FLX Pyro-R62	GCCTTGCCAGCCCGCTCAG ACCAACCA GC GGACTACCVGGGTATCTAAT	GCCTTGCCAGCCCGCTCAG	ACCAACCA	GC	GGACTACCVGGGTATCTAAT
FLX Pyro-R63	GCCTTGCCAGCCCGCTCAG ACGAACCT GC GGACTACCVGGGTATCTAAT	GCCTTGCCAGCCCGCTCAG	ACGAACCT	GC	GGACTACCVGGGTATCTAAT
FLX Pyro-R64	GCCTTGCCAGCCCGCTCAG ACTCACAG GC GGACTACCVGGGTATCTAAT	GCCTTGCCAGCCCGCTCAG	ACTCACAG	GC	GGACTACCVGGGTATCTAAT
FLX Pyro-R65	GCCTTGCCAGCCCGCTCAG AGCAACCT GC GGACTACCVGGGTATCTAAT	GCCTTGCCAGCCCGCTCAG	AGCAACCT	GC	GGACTACCVGGGTATCTAAT
FLX Pyro-R66	GCCTTGCCAGCCCGCTCAG AGTCACAC GC GGACTACCVGGGTATCTAAT	GCCTTGCCAGCCCGCTCAG	AGTCACAC	GC	GGACTACCVGGGTATCTAAT
FLX Pyro-R67	GCCTTGCCAGCCCGCTCAG ATAACCGC GC GGACTACCVGGGTATCTAAT	GCCTTGCCAGCCCGCTCAG	ATAACCGC	GC	GGACTACCVGGGTATCTAAT
FLX Pyro-R68	GCCTTGCCAGCCCGCTCAG CAACACCA GC GGACTACCVGGGTATCTAAT	GCCTTGCCAGCCCGCTCAG	CAACACCA	GC	GGACTACCVGGGTATCTAAT
FLX Pyro-R69	GCCTTGCCAGCCCGCTCAG CAGAACAG GC GGACTACCVGGGTATCTAAT	GCCTTGCCAGCCCGCTCAG	CAGAACAG	GC	GGACTACCVGGGTATCTAAT
FLX Pyro-R70	GCCTTGCCAGCCCGCTCAG CCAACCTT GC GGACTACCVGGGTATCTAAT	GCCTTGCCAGCCCGCTCAG	CCAACCTT	GC	GGACTACCVGGGTATCTAAT
FLX Pyro-R71	GCCTTGCCAGCCCGCTCAG CCGCAATA GC GGACTACCVGGGTATCTAAT	GCCTTGCCAGCCCGCTCAG	CCGCAATA	GC	GGACTACCVGGGTATCTAAT
FLX Pyro-R72	GCCTTGCCAGCCCGCTCAG CCTAATCC GC GGACTACCVGGGTATCTAAT	GCCTTGCCAGCCCGCTCAG	CCTAATCC	GC	GGACTACCVGGGTATCTAAT
FLX Pyro-R73	GCCTTGCCAGCCCGCTCAG CGAACCAT GC GGACTACCVGGGTATCTAAT	GCCTTGCCAGCCCGCTCAG	CGAACCAT	GC	GGACTACCVGGGTATCTAAT
FLX Pyro-R74	GCCTTGCCAGCCCGCTCAG CGATAACC GC GGACTACCVGGGTATCTAAT	GCCTTGCCAGCCCGCTCAG	CGATAACC	GC	GGACTACCVGGGTATCTAAT
FLX Pyro-R75	GCCTTGCCAGCCCGCTCAG CTACACCT GC GGACTACCVGGGTATCTAAT	GCCTTGCCAGCCCGCTCAG	CTACACCT	GC	GGACTACCVGGGTATCTAAT
FLX Pyro-R76	GCCTTGCCAGCCCGCTCAG CTCAACAG GC GGACTACCVGGGTATCTAAT	GCCTTGCCAGCCCGCTCAG	CTCAACAG	GC	GGACTACCVGGGTATCTAAT
FLX Pyro-R77	GCCTTGCCAGCCCGCTCAG CTTCACCA GC GGACTACCVGGGTATCTAAT	GCCTTGCCAGCCCGCTCAG	CTTCACCA	GC	GGACTACCVGGGTATCTAAT
FLX Pyro-R78	GCCTTGCCAGCCCGCTCAG GAACACGA GC GGACTACCVGGGTATCTAAT	GCCTTGCCAGCCCGCTCAG	GAACACGA	GC	GGACTACCVGGGTATCTAAT
FLX Pyro-R79	GCCTTGCCAGCCCGCTCAG GAGAACAC GC GGACTACCVGGGTATCTAAT	GCCTTGCCAGCCCGCTCAG	GAGAACAC	GC	GGACTACCVGGGTATCTAAT
FLX Pyro-R80	GCCTTGCCAGCCCGCTCAG GATGTGGA GC GGACTACCVGGGTATCTAAT	GCCTTGCCAGCCCGCTCAG	GATGTGGA	GC	GGACTACCVGGGTATCTAAT
