# Supplementary material for: Bacterial Communities in Women with Bacterial Vaginosis: High Resolution Phylogenetic Analyses Reveal Relationships of Microbiota to Clinical Criteria
Source: PLoS One. 2012 Jun 18;7(6):e37818. doi: 10.1371/journal.pone.0037818 (PMC3377712; doi:10.1371/journal.pone.0037818)
Supplement: Table S2 — Tally of sequences representing each taxon in the vaginal reference package. (XLSX) [file pone.0037818.s005.xlsx]

## Sheet: vaginal-0 9 0 tally
tax_name	tax_id	count
Acinetobacter baumannii	470	5
Acinetobacter calcoaceticus	471	5
Actinobaculum massiliense	202789	5
Actinomyces hongkongensis	178339	1
Actinomyces lingnae	114702	1
Actinomyces meyeri	52773	2
Actinomyces neuii	33007	4
Actinomyces urogenitalis	103621	3
Aerococcus christensenii	87541	5
Aerococcus viridans	1377	5
Agrobacterium tumefaciens	358	5
Alistipes finegoldii	214856	4
Alloscardovia omnicolens	419015	5
Anaerococcus hydrogenalis	33029	1
Anaerococcus lactolyticus	33032	1
Anaerococcus murdochii	411577	1
Anaerococcus octavius	54007	1
Anaerococcus prevotii	33034	5
Anaerococcus tetradius	33036	5
Anaerococcus vaginalis	33037	2
Arcanobacterium haemolyticum	28264	5
Arcanobacterium hippocoleae	149017	1
Arcanobacterium phocae	131112	5
Asticcacaulis excentricus	78587	5
Atopobium minutum	1381	4
Atopobium rimae	1383	5
Atopobium vaginae	82135	5
Bacteroides coagulans	46507	2
Bacteroides faecis	674529	2
Bacteroides galacturonicus	384639	1
Bacteroides nordii	291645	4
Bacteroides stercoris	46506	2
Bacteroides uniformis	820	5
Bacteroides xylanisolvens	371601	2
Bifidobacterium bifidum	1681	5
Bifidobacterium breve	1685	5
Bilophila wadsworthia	35833	3
Brevibacterium massiliense	576927	1
Brevibacterium otitidis	53364	4
Brevibacterium paucivorans	170994	2
Burkholderia cepacia	292	5
BVAB1	186802_1	5
BVAB2	186802_2	5
BVAB3	186802_3	4
Campylobacter ureolyticus	827	5
candidate division TM7 genomosp. P1	239137	4
Candidate Division TM7 vaginal	95818_1	4
Candidatus Peptoniphilus massiliensis	337315	2
Catonella morbi	43997	3
Clostridium colicanis	179628	5
Corynebacterium accolens	38284	4
Corynebacterium pyruviciproducens	598660	1
Corynebacterium tuberculostearicum	38304	5
Corynebacterium ulceribovis	487732	1
Corynebacterium ureicelerivorans	401472	2
Delftia tsuruhatensis	180282	5
Dermacoccus nishinomiyaensis	1274	3
Dialister micraerophilus	309120	10
Dialister pneumosintes	39950	4
Dialister propionicifaciens	308994	10
Dialister sp. type 2	39948_2	10
Dialister succinatiphilus	487173	1
Dorea longicatena	88431	3
Eggerthella sp. type 1	84111_1	5
Enhydrobacter aerosaccus	225324	1
Enterococcus avium	33945	5
Enterococcus durans	53345	5
Enterococcus faecalis	1351	5
Enterococcus faecium	1352	4
Escherichia coli	562	5
Eubacterium eligens	39485	5
Eubacterium ramulus	39490	1
Eubacterium rectale	39491	5
Eubacterium saphenum	51123	2
Eubacterium siraeum	39492	2
Faecalibacterium prausnitzii	853	4
Fastidiosipila sanguinis	236753	1
Finegoldia magna	1260	5
Fusobacterium gonidiaformans	849	3
Fusobacterium nucleatum	851	5
Fusobacterium periodonticum	860	5
Gardnerella vaginalis	2702	10
Gemella haemolysans	1379	5
Haemophilus parainfluenzae	729	5
Haemophilus pittmaniae	249188	2
Howardella ureilytica	404403	1
Lactobacillus coleohominis	181675	3
Lactobacillus crispatus	47770	10
Lactobacillus fermentum	1613	10
Lactobacillus gasseri	1596	10
Lactobacillus iners	147802	10
Lactobacillus jensenii	109790	10
Lactobacillus kalixensis	227944	2
Lactobacillus plantarum	1590	10
Lactobacillus vaginalis	1633	10
Leptotrichia amnionii	187101	5
Mannheimia granulomatis	85402	5
Megasphaera micronuciformis	187326	3
Megasphaera sp. type 1	906_1	5
Megasphaera sp. type 2	906_2	5
Methylotenera versatilis	1055487	2
Mobiluncus curtisii	2051	5
Mobiluncus mulieris	2052	5
Moryella indoligenes	371674	3
Mycobacterium novocastrense	59813	1
Mycoplasma genitalium	2097	4
Mycoplasma hominis	2098	5
Neisseria gonorrhoeae	485	5
Neisseria subflava	28449	5
Parabacteroides merdae	46503	5
Parasutterella excrementihominis	487175	1
Parvimonas micra	33033	5
Pediococcus acidilactici	1254	5
Pelomonas aquatica	431058	4
Peptoniphilus asaccharolyticus	1258	1
Peptoniphilus duerdenii	507750	1
Peptoniphilus harei	54005	5
Peptoniphilus indolicus	33030	3
Peptoniphilus lacrimalis	33031	5
Peptostreptococcus anaerobius	1261	1
Peptostreptococcus stomatis	341694	3
Porphyromonas asaccharolytica	28123	5
Porphyromonas bennonis	501496	2
Porphyromonas endodontalis	28124	2
Porphyromonas somerae	322095	2
Porphyromonas sp. type 1	2_1	3
Porphyromonas uenonis	281920	2
Prevotella amnii	419005	10
Prevotella bergensis	242750	2
Prevotella bivia	28125	6
Prevotella buccalis	28127	4
Prevotella corporis	28128	1
Prevotella disiens	28130	5
Prevotella genogroup 3	838_3	7
Prevotella genogroup 4	838_4	8
Prevotella genogroup 5	838_5	1
Prevotella genogroup 6	838_6	3
Prevotella genogroup 7	838_7	3
Prevotella intermedia	28131	10
Prevotella melaninogenica	28132	10
Prevotella timonensis	386414	10
Pseudomonas aeruginosa	287	2
Pseudomonas fluorescens	294	2
Pseudomonas fulva	47880	2
Pseudomonas monteilii	76759	2
Pseudomonas mosselii	78327	2
Pseudomonas oryzihabitans	47885	1
Pseudomonas plecoglossicida	70775	2
Pseudomonas putida	303	1
Pseudomonas stutzeri	316	2
Psychrobacter pulmonis	228654	5
Raoultella planticola	575	5
Rhizobacter dauci	431677	2
Rhodopseudomonas palustris	1076	5
Roseburia faecis	301302	3
Roseburia hominis	301301	2
Roseburia intestinalis	166486	5
Roseburia inulinivorans	360807	2
Ruminococcus obeum	40520	5
Serratia marcescens	615	5
Shuttleworthia satelles	177972	1
Slackia exigua	84109	3
Sneathia sanguinegens	40543	5
Staphylococcus aureus	1280	5
Staphylococcus capitis	29388	5
Staphylococcus epidermidis	1282	5
Staphylococcus haemolyticus	1283	5
Staphylococcus hominis	1290	5
Staphylococcus lugdunensis	28035	5
Staphylococcus warneri	1292	5
Streptococcus agalactiae	1311	5
Streptococcus anginosus	1328	5
Streptococcus constellatus	76860	5
Streptococcus equinus	1335	5
Streptococcus gallolyticus	315405	5
Streptococcus intermedius	1338	5
Streptococcus mitis	28037	2
Streptococcus mutans	1309	5
Streptococcus oralis	1303	5
Streptococcus parasanguinis	1318	5
Streptococcus salivarius	1304	5
Streptococcus sanguinis	1305	5
Streptococcus thermophilus	1308	5
Sutterella morbirenis	293545	1
Sutterella stercoricanis	234908	1
Sutterella wadsworthensis	40545	4
Terrahaemophilus aromaticivorans	217202	1
Ureaplasma parvum	134821	5
Ureaplasma urealyticum	2130	5
Varibaculum cambriense	184870	5
Veillonella atypica	39777	4
Veillonella montpellierensis	187328	5
Veillonella parvula	29466	5
Weissella paramesenteroides	1249	5
		796
