# Supplementary material for: Bacterial Communities in Women with Bacterial Vaginosis: High Resolution Phylogenetic Analyses Reveal Relationships of Microbiota to Clinical Criteria
Source: PLoS One. 2012 Jun 18;7(6):e37818. doi: 10.1371/journal.pone.0037818 (PMC3377712; doi:10.1371/journal.pone.0037818)
Supplement: Table S6 — Bacterial clusters in the Clostridiales Order. (XLSX) [file pone.0037818.s009.xlsx]

## Sheet: compressed.020_nosingle.blast
label	size	n_specimens	tax_names	accession	identity	hit_def
BVAB2/Clostridiales C14 [N=5880]	5880	134	BVAB2/Clostridiales	HM051337	87.8431	Clostridium perfringens strain RKI09057 16S ribosomal RNA gene, partial sequence
BVAB1/Clostridiales C15 [N=19028]	19028	75	BVAB1/Clostridiales	AF298665	89.916	Lachnobacterium bovis strain LRC 5436 16S ribosomal RNA gene, partial sequence
BVAB3 C13 [N=952]	952	56	BVAB3	NR_026102	90.8257	Clostridium papyrosolvens DSM 2782 16S ribosomal RNA, complete sequence
Clostridiales C10 [N=10]	10	5	Clostridiales	AF298665	91.1765	Lachnobacterium bovis strain LRC 5436 16S ribosomal RNA gene, partial sequence
Peptoniphilus C26 [N=3]	3	2	Peptoniphilus	NR_041938	92.4686	Peptoniphilus lacrimalis strain CCUG 31350 16S ribosomal RNA, partial sequence
Lachnospiraceae C12 [N=115]	115	12	Lachnospiraceae	NR_036869	93.3333	Syntrophococcus sucromutans strain S195 16S ribosomal RNA, partial sequence
Parvimonas micra C35 [N=228]	228	7	Parvimonas micra	GU401221	93.5484	Parvimonas micra clone WWP_SS6_P04 16S ribosomal RNA gene, partial sequence
Clostridiales/Clostridium colicanis C3 [N=170]	170	15	Clostridiales/Clostridium colicanis	FR733677	93.617	Eubacterium tarantellae partial 16S rRNA gene, type strain DSM3997T
Ruminococcus obeum C7 [N=6]	6	2	Ruminococcus obeum	AF287777	93.6508	Eubacterium cf. saburreum oral strain C27KA 16S ribosomal RNA gene, partial sequence
Peptoniphilus C24 [N=12]	12	10	Peptoniphilus	AB640690	93.8017	Peptoniphilus asaccharolyticus gene for 16S ribosomal RNA, partial sequence, strain: JCM 1765
Lachnospiraceae C8 [N=13]	13	4	Lachnospiraceae	NR_036869	94.2966	Syntrophococcus sucromutans strain S195 16S ribosomal RNA, partial sequence
Lachnospiraceae C4 [N=20]	20	4	Lachnospiraceae	AB661435	95.5645	Roseburia intestinalis gene for 16S ribosomal RNA, partial sequence, strain: JCM 17583
Peptoniphilus C25 [N=63]	63	19	Peptoniphilus	GU440754	96.1207	Peptoniphilus methioninivorax strain NRRL B-23883 16S ribosomal RNA gene, partial sequence
Clostridiales C2 [N=23]	23	7	Clostridiales	FR733677	96.6387	Eubacterium tarantellae partial 16S rRNA gene, type strain DSM3997T
Parvimonas micra C36 [N=2997]	2997	131	Parvimonas micra	GU401221	97.3384	Parvimonas micra clone WWP_SS6_P04 16S ribosomal RNA gene, partial sequence
Peptostreptococcus C27 [N=2]	2	2	Peptostreptococcus	L04168	98	Peptostreptococcus anaerobius 16S ribosomal RNA gene, complete sequence
Ruminococcaceae C6 [N=4]	4	2	Ruminococcaceae	NR_042186	98.5915	Fastidiosipila sanguinis strain : CCUG 47367 = CIP 108292 16S ribosomal RNA, complete sequence
Anaerococcus vaginalis C22 [N=27]	27	9	Anaerococcus vaginalis	AB538433	98.7755	Anaerococcus hydrogenalis gene for 16S ribosomal RNA, partial sequence, strain: JCM 7635
Peptostreptococcus C29 [N=1056]	1056	61	Peptostreptococcus	AB640696	98.8095	Peptostreptococcus anaerobius gene for 16S ribosomal RNA, partial sequence, strain: JCM 6478
Faecalibacterium prausnitzii C11 [N=15]	15	3	Faecalibacterium prausnitzii	FP929046	99.0244	Faecalibacterium prausnitzii SL3/3 draft genome
Clostridium colicanis C1 [N=35]	35	2	Clostridium colicanis	FJ957870	99.1736	Clostridium colicanis strain JPL_15 16S ribosomal RNA gene, partial sequence
Anaerococcus vaginalis C23 [N=34]	34	4	Anaerococcus vaginalis	NR_041937	99.2032	Anaerococcus vaginalis ATCC 51170 strain CCUG 31349 16S ribosomal RNA, partial sequence
Anaerococcus C31 [N=41]	41	13	Anaerococcus	AB558162	99.2337	Anaerococcus prevotii gene for 16S ribosomal RNA, partial sequence, strain: JCM 6490
Anaerococcus C30 [N=25]	25	8	Anaerococcus	AB673373	99.5455	Anaerococcus lactolyticus gene for 16S ribosomal RNA, partial sequence, strain: JCM 8140
Anaerococcus C21 [N=3]	3	3	Anaerococcus	AB538433	99.5935	Anaerococcus hydrogenalis gene for 16S ribosomal RNA, partial sequence, strain: JCM 7635
Peptoniphilus harei C20 [N=54]	54	28	Peptoniphilus harei	DQ986463	99.5951	Peptoniphilus asaccharolyticus 16S ribosomal RNA gene, partial sequence
Finegoldia magna C34 [N=164]	164	38	Finegoldia magna	AB640691	99.6169	Finegoldia magna gene for 16S ribosomal RNA, partial sequence, strain: JCM 1766
Anaerococcus C17 [N=7]	7	4	Anaerococcus	NR_026360	100	Anaerococcus octavius strain NCTC 9810 16S ribosomal RNA, partial sequence
Anaerococcus tetradius C32 [N=508]	508	70	Anaerococcus tetradius	AB558162	100	Anaerococcus prevotii gene for 16S ribosomal RNA, partial sequence, strain: JCM 6490
Candidatus Peptoniphilus massiliensis C16 [N=40]	40	8	Candidatus Peptoniphilus massiliensis	EU526292	100	Candidatus Peptoniphilus massiliensis 16S ribosomal RNA gene, partial sequence
Parvimonas micra C33 [N=2]	2	2	Parvimonas micra	GU401221	100	Parvimonas micra clone WWP_SS6_P04 16S ribosomal RNA gene, partial sequence
Peptoniphilus harei C19 [N=3]	3	2	Peptoniphilus harei	GU723316	100	Peptoniphilus gorbachii strain KCTC5924 16S ribosomal RNA gene, partial sequence
Peptoniphilus lacrimalis C18 [N=44]	44	13	Peptoniphilus lacrimalis	NR_041938	100	Peptoniphilus lacrimalis strain CCUG 31350 16S ribosomal RNA, partial sequence
Peptostreptococcus stomatis C28 [N=58]	58	10	Peptostreptococcus stomatis	GU401400	100	Peptostreptococcus stomatis clone WWE_MCE10_257 16S ribosomal RNA gene, partial sequence
Ruminococcaceae C9 [N=4]	4	2	Ruminococcaceae	FP929055	100	Ruminococcus torques L2-14 draft genome
Ruminococcus obeum C5 [N=6]	6	3	Ruminococcus obeum	NR_044054	100	Blautia wexlerae strain WAL 14507 16S ribosomal RNA, partial sequence
