# Supplementary material for: Bacterial Communities in Women with Bacterial Vaginosis: High Resolution Phylogenetic Analyses Reveal Relationships of Microbiota to Clinical Criteria
Source: PLoS One. 2012 Jun 18;7(6):e37818. doi: 10.1371/journal.pone.0037818 (PMC3377712; doi:10.1371/journal.pone.0037818)
Supplement: Table S7 — Pearson correlation coefficients between the most abundant taxa. (XLSX) [file pone.0037818.s010.xlsx]

## Sheet: cooccur-correlations
	Aerococcus christensenii	Anaerococcus prevotii/tetradius	Atopobium vaginae	Bacteroides/Porphyromonas	Bifidobacterium breve	BVAB1	BVAB2	BVAB3	Candidate Division TM7 vaginal	Clostridiales	Dialister micraerophilus	Dialister sp. type 2	Eggerthella sp. type 1	Finegoldia magna	Fusobacterium gonidiaformans	Fusobacterium nucleatum	Gardnerella vaginalis	Gemella haemolysans	Lactobacillus crispatus	Lactobacillus gasseri	Lactobacillus iners	Lactobacillus jensenii	Lactobacillus vaginalis	Leptotrichia amnionii	Megasphaera sp. type 1	Megasphaera sp. type 2	Mycoplasma hominis	Parvimonas micra	Peptostreptococcus	Porphyromonas	Porphyromonas asaccharolytica	Porphyromonas bennonis	Prevotella	Prevotella amnii	Prevotella bivia	Prevotella buccalis	Prevotella disiens	Prevotella genogroup 3	Prevotella genogroup 4	Prevotella melaninogenica	Prevotella timonensis	Sneathia	Sneathia sanguinegens	Streptococcus mitis/oralis	Sutterella wadsworthensis	Veillonella montpellierensis
Aerococcus christensenii	1	0.446069	0.578214	0.113911	0.0444169	0.0887666	0.364573	0.146637	0.0904827	-0.0482458	0.506171	0.436074	0.493552	0.239794	0.063901	0.0353529	0.646965	0.236527	-0.400432	-0.108522	0.0807984	-0.220423	-0.19708	0.274745	0.298766	0.162693	0.305553	0.332544	0.132013	0.102093	0.126139	-0.101136	0.125413	0.190217	0.340399	0.29607	0.193628	0.118189	0.177805	0.166637	0.38665	0.0381474	0.255259	0.0236728	-0.126663	0.248326
Anaerococcus prevotii/tetradius	0.446069	1	0.329125	0.144066	-0.00961863	0.0234526	0.208213	0.199054	0.0483942	-0.0316431	0.47596	0.396098	0.288635	0.328679	0.0981971	0.0675065	0.419675	0.370561	-0.252606	-0.114724	0.00620801	-0.168734	-0.168633	0.225989	0.0845202	0.147017	0.390673	0.332248	0.485977	0.163996	0.0952764	-0.0194597	0.107751	0.0887263	0.458148	0.246156	0.310604	0.17254	0.138459	0.232403	0.394862	0.111287	0.158164	0.0483456	-0.0316637	0.206846
Atopobium vaginae	0.578214	0.329125	1	0.198993	0.171062	0.233809	0.60081	0.293248	0.122183	-0.0410255	0.626788	0.628513	0.786463	0.0976886	0.0827677	0.250409	0.797033	0.389651	-0.505252	-0.241503	-0.166603	-0.456634	-0.226329	0.579363	0.56008	0.312983	0.369394	0.646863	0.282086	0.245377	0.352621	-0.0485095	0.231833	0.466429	0.436604	0.484615	0.345643	0.20704	0.22074	0.20616	0.619516	0.187133	0.529386	-0.0910785	-0.012357	0.105198
Bacteroides/Porphyromonas	0.113911	0.144066	0.198993	1	0.0227831	0.437971	0.355512	0.544999	0.253371	0.0215685	0.220396	0.205258	0.297408	-0.0412484	0.0802213	0.333088	0.161751	0.0656455	-0.219762	-0.11322	-0.168223	-0.221919	-0.0710653	0.332007	0.191892	0.369718	0.163033	0.362638	0.249353	0.741707	0.257102	0.127234	0.365985	0.243756	0.00996492	0.146444	0.158833	0.46108	0.234031	0.0936598	0.246564	0.237586	0.364546	0.0452904	0.0935368	0.0317465
Bifidobacterium breve	0.0444169	-0.00961863	0.171062	0.0227831	1	0.0576474	0.0757473	0.0318985	0.0336869	0.000493285	0.241914	0.0106913	0.141515	0.0118677	0.0194678	0.0725815	0.0823775	0.19766	-0.0803673	0.0138736	-0.167006	-0.0634788	0.00700633	0.142956	-0.00513115	0.230958	0.394438	0.274387	0.0804282	0.0189709	0.139006	0.0696035	0.0797137	-0.00942542	0.241001	0.212068	0.286795	0.140127	0.0132865	0.192902	0.188455	0.356516	0.0669709	0.0385412	0.0779161	0.0228479
BVAB1	0.0887666	0.0234526	0.233809	0.437971	0.0576474	1	0.35264	0.506759	0.293299	0.0530808	0.16443	0.293271	0.402971	-0.0118814	0.0314702	0.159138	0.216181	0.0549364	-0.316531	-0.182222	-0.16976	-0.304189	-0.153426	0.423535	0.460471	0.323053	0.0789679	0.380742	0.0343831	0.486567	0.282666	0.0472358	0.286732	0.393559	-0.0304233	0.148018	0.0398956	0.644748	0.156088	-0.0521916	0.23661	0.0259053	0.443025	-0.0590267	-0.0299031	-0.0899322
BVAB2	0.364573	0.208213	0.60081	0.355512	0.0757473	0.35264	1	0.51649	0.221278	0.0757973	0.367793	0.636448	0.716026	-0.0347926	-0.00371922	0.207066	0.554464	0.186388	-0.430063	-0.247018	-0.203082	-0.425504	-0.227285	0.6763	0.644184	0.395911	0.167969	0.71891	0.095334	0.32307	0.490143	-0.0407615	0.248813	0.547066	0.129813	0.558101	0.2246	0.362385	0.333567	0.133652	0.684104	0.184379	0.632595	-0.0846219	0.0528082	-0.0677675
BVAB3	0.146637	0.199054	0.293248	0.544999	0.0318985	0.506759	0.51649	1	0.295342	0.0197305	0.206317	0.349985	0.422159	-0.00179429	0.0585362	0.269261	0.30644	0.136411	-0.291645	-0.168506	-0.149567	-0.281634	-0.12178	0.503451	0.332391	0.454216	0.163065	0.466762	0.157557	0.515207	0.319196	0.062057	0.219046	0.444136	-0.0269827	0.210471	0.0436844	0.546803	0.29775	0.0389765	0.342626	0.101196	0.503258	-0.0457996	-0.0326925	-0.0501953
Candidate Division TM7 vaginal	0.0904827	0.0483942	0.122183	0.253371	0.0336869	0.293299	0.221278	0.295342	1	-0.0179869	0.120249	0.199607	0.212472	-0.0243507	0.0668147	0.0696745	0.106626	0.102413	-0.146205	-0.0381729	-0.014472	-0.128164	-0.0200523	0.244467	0.237165	0.0985204	0.136216	0.169348	-0.0593369	0.294931	0.0433799	0.0466877	0.183641	0.30801	-0.0421095	0.043142	-0.0604309	0.380768	0.0971906	0.0160295	0.124025	0.069918	0.224356	0.0157078	0.0547373	0.0446639
Clostridiales	-0.0482458	-0.0316431	-0.0410255	0.0215685	0.000493285	0.0530808	0.0757973	0.0197305	-0.0179869	1	-0.092711	-0.0264241	-0.0147435	-0.0549017	-0.0206728	-0.0439232	-0.063228	-0.0524633	0.211359	-0.0297562	-0.113483	0.084369	0.024214	0.0011959	-0.0477066	0.100779	-0.0285509	0.027524	-0.0331334	0.028676	0.0659783	0.024175	-0.0168635	0.0537528	-0.114911	0.0342346	0.0640852	0.0382815	0.0444967	-0.0538839	-0.00746095	0.0415398	0.0162276	0.00697165	0.0526219	-0.04484
Dialister micraerophilus	0.506171	0.47596	0.626788	0.220396	0.241914	0.16443	0.367793	0.206317	0.120249	-0.092711	1	0.568133	0.589864	0.26174	0.0775321	0.150057	0.633864	0.497393	-0.377201	-0.132765	-0.16064	-0.30688	-0.189303	0.450713	0.367312	0.270553	0.44905	0.487613	0.33612	0.214611	0.211401	-0.0305619	0.344712	0.24682	0.564983	0.425857	0.320368	0.261449	0.191008	0.290198	0.5036	0.195546	0.404707	-0.00201439	0.0398714	0.209935
Dialister sp. type 2	0.436074	0.396098	0.628513	0.205258	0.0106913	0.293271	0.636448	0.349985	0.199607	-0.0264241	0.568133	1	0.707832	0.129637	0.0127172	0.106962	0.648464	0.313353	-0.413844	-0.22664	-0.186013	-0.407579	-0.210683	0.580579	0.595768	0.355274	0.263845	0.541368	0.165377	0.195971	0.310652	0.0285633	0.295878	0.506522	0.276183	0.561309	0.262779	0.311395	0.40556	0.149203	0.676049	0.102124	0.519545	-0.0312714	-0.0104254	0.0709406
Eggerthella sp. type 1	0.493552	0.288635	0.786463	0.297408	0.141515	0.402971	0.716026	0.422159	0.212472	-0.0147435	0.589864	0.707832	1	0.0250906	0.0711316	0.216202	0.725193	0.386039	-0.500973	-0.233771	-0.245516	-0.501077	-0.303717	0.737693	0.690792	0.377714	0.311479	0.714281	0.12673	0.273869	0.396821	-0.0810606	0.287842	0.566642	0.32722	0.51812	0.236679	0.353902	0.219186	0.176976	0.656361	0.211276	0.688836	-0.0926596	-0.0438453	0.0704186
Finegoldia magna	0.239794	0.328679	0.0976886	-0.0412484	0.0118677	-0.0118814	-0.0347926	-0.00179429	-0.0243507	-0.0549017	0.26174	0.129637	0.0250906	1	0.0970634	-0.0089808	0.231471	0.0656795	0.0195166	0.154245	0.151951	0.0379678	0.0619981	-0.0916264	0.0085049	0.0463525	0.0244286	-0.0591066	0.260336	-0.00965276	0.00211218	0.195499	0.0443616	-0.0685682	0.221188	0.0753721	0.068457	0.0315992	0.0138321	0.188965	0.13065	-0.0193128	-0.01442	0.187107	0.0849281	0.248634
Fusobacterium gonidiaformans	0.063901	0.0981971	0.0827677	0.0802213	0.0194678	0.0314702	-0.00371922	0.0585362	0.0668147	-0.0206728	0.0775321	0.0127172	0.0711316	0.0970634	1	0.284178	0.0254145	0.254089	-0.0399098	0.0469464	-0.0927312	-0.121552	-0.0253901	0.0774853	0.0476199	0.0278937	0.165757	0.164881	0.1996	0.191335	0.157039	0.0519734	0.162463	0.0302737	0.20982	0.0530053	0.164036	0.0276079	0.00658452	0.209593	0.0595803	0.218096	-0.00964801	0.221724	0.424068	0.040985
Fusobacterium nucleatum	0.0353529	0.0675065	0.250409	0.333088	0.0725815	0.159138	0.207066	0.269261	0.0696745	-0.0439232	0.150057	0.106962	0.216202	-0.0089808	0.284178	1	0.111148	0.226438	-0.192168	-0.100996	-0.22851	-0.214516	-0.0962404	0.297002	0.148912	0.190915	0.228968	0.378887	0.32102	0.434772	0.416577	0.0567643	0.134932	0.176594	0.128635	0.187755	0.233057	0.07597	0.0696105	0.170391	0.311691	0.289553	0.241537	0.0559423	0.206136	0.0413928
Gardnerella vaginalis	0.646965	0.419675	0.797033	0.161751	0.0823775	0.216181	0.554464	0.30644	0.106626	-0.063228	0.633864	0.648464	0.725193	0.231471	0.0254145	0.111148	1	0.362323	-0.511969	-0.147805	0.00158001	-0.389596	-0.184931	0.496827	0.537787	0.255508	0.315471	0.527645	0.250645	0.145436	0.252086	-0.0256292	0.224722	0.411195	0.406637	0.431036	0.251108	0.219635	0.221389	0.15848	0.589056	0.0836842	0.455691	0.00651689	-0.0752454	0.204772
Gemella haemolysans	0.236527	0.370561	0.389651	0.0656455	0.19766	0.0549364	0.186388	0.136411	0.102413	-0.0524633	0.497393	0.313353	0.386039	0.0656795	0.254089	0.226438	0.362323	1	-0.233169	-0.0339602	-0.162689	-0.164158	-0.085071	0.287084	0.12644	0.123558	0.583297	0.462319	0.357761	0.263332	0.185691	0.0267007	0.17054	0.095746	0.532803	0.336238	0.210518	0.195966	0.0864486	0.348927	0.292846	0.327421	0.214166	0.0923389	0.24307	0.128715
Lactobacillus crispatus	-0.400432	-0.252606	-0.505252	-0.219762	-0.0803673	-0.316531	-0.430063	-0.291645	-0.146205	0.211359	-0.377201	-0.413844	-0.500973	0.0195166	-0.0399098	-0.192168	-0.511969	-0.233169	1	0.318901	-0.137574	0.383839	0.278249	-0.44498	-0.467526	-0.187758	-0.217812	-0.429236	-0.187974	-0.236998	-0.282957	0.0166055	-0.251008	-0.355022	-0.320299	-0.315246	-0.227107	-0.259503	-0.14575	-0.1551	-0.453075	-0.133386	-0.417306	-0.0635742	-0.0199611	-0.091706
Lactobacillus gasseri	-0.108522	-0.114724	-0.241503	-0.11322	0.0138736	-0.182222	-0.247018	-0.168506	-0.0381729	-0.0297562	-0.132765	-0.22664	-0.233771	0.154245	0.0469464	-0.100996	-0.147805	-0.0339602	0.318901	1	0.165211	0.414836	0.368554	-0.217299	-0.236628	-0.0923334	-0.0402514	-0.228814	-0.0200804	-0.0918872	-0.0608807	0.159271	-0.063342	-0.200223	-0.0580473	-0.129783	-0.0369277	-0.0936666	-0.037525	0.00324434	-0.202325	0.0125892	-0.215278	0.08567	0.129564	0.158417
Lactobacillus iners	0.0807984	0.00620801	-0.166603	-0.168223	-0.167006	-0.16976	-0.203082	-0.149567	-0.014472	-0.113483	-0.16064	-0.186013	-0.245516	0.151951	-0.0927312	-0.22851	0.00158001	-0.162689	-0.137574	0.165211	1	0.260479	0.11603	-0.340306	-0.155784	-0.26003	-0.18871	-0.269404	-0.0973221	-0.213013	-0.274802	-0.0102505	-0.218704	-0.129908	-0.155293	-0.317228	-0.185428	-0.127948	-0.1272	-0.152948	-0.285939	-0.230626	-0.225219	-0.0286292	-0.142369	0.0637754
Lactobacillus jensenii	-0.220423	-0.168734	-0.456634	-0.221919	-0.0634788	-0.304189	-0.425504	-0.281634	-0.128164	0.084369	-0.30688	-0.407579	-0.501077	0.0379678	-0.121552	-0.214516	-0.389596	-0.164158	0.383839	0.414836	0.260479	1	0.371707	-0.483873	-0.474371	-0.202818	-0.17358	-0.412999	-0.134927	-0.211678	-0.250488	0.0469414	-0.219543	-0.371487	-0.210314	-0.284815	-0.162043	-0.239951	-0.10048	-0.0942005	-0.401835	-0.0993015	-0.412883	-0.0288099	-0.0140208	0.00804897
Lactobacillus vaginalis	-0.19708	-0.168633	-0.226329	-0.0710653	0.00700633	-0.153426	-0.227285	-0.12178	-0.0200523	0.024214	-0.189303	-0.210683	-0.303717	0.0619981	-0.0253901	-0.0962404	-0.184931	-0.085071	0.278249	0.368554	0.11603	0.371707	1	-0.207046	-0.1677	0.0124832	0.0347563	-0.145762	0.0645265	0.0726262	-0.0275555	0.425897	0.0320434	-0.117843	-0.0660404	-0.0355158	-0.00780489	-0.0128001	0.114821	0.0862409	-0.172244	0.158654	-0.14739	0.186639	0.276408	0.15091
Leptotrichia amnionii	0.274745	0.225989	0.579363	0.332007	0.142956	0.423535	0.6763	0.503451	0.244467	0.0011959	0.450713	0.580579	0.737693	-0.0916264	0.0774853	0.297002	0.496827	0.287084	-0.44498	-0.217299	-0.340306	-0.483873	-0.207046	1	0.587266	0.442242	0.311418	0.741572	0.182006	0.375557	0.49817	0.00302538	0.327606	0.582788	0.228916	0.542935	0.254879	0.494575	0.324669	0.193212	0.638832	0.262382	0.806431	0.000622777	0.100617	0.0603333
Megasphaera sp. type 1	0.298766	0.0845202	0.56008	0.191892	-0.00513115	0.460471	0.644184	0.332391	0.237165	-0.0477066	0.367312	0.595768	0.690792	0.0085049	0.0476199	0.148912	0.537787	0.12644	-0.467526	-0.236628	-0.155784	-0.474371	-0.1677	0.587266	1	0.177723	0.0342364	0.509486	0.00804788	0.206725	0.294209	0.0180206	0.32456	0.548274	0.112834	0.431108	0.108228	0.402352	0.246888	0.0619024	0.56103	0.147167	0.65613	-0.0847392	0.0421428	-0.051737
Megasphaera sp. type 2	0.162693	0.147017	0.312983	0.369718	0.230958	0.323053	0.395911	0.454216	0.0985204	0.100779	0.270553	0.355274	0.377714	0.0463525	0.0278937	0.190915	0.255508	0.123558	-0.187758	-0.0923334	-0.26003	-0.202818	0.0124832	0.442242	0.177723	1	0.382375	0.520346	0.15742	0.381391	0.348517	0.263238	0.469799	0.348921	0.0844725	0.393407	0.172414	0.520564	0.471811	0.209043	0.359789	0.173229	0.423425	0.12023	0.132212	0.108967
Mycoplasma hominis	0.305553	0.390673	0.369394	0.163033	0.394438	0.0789679	0.167969	0.163065	0.136216	-0.0285509	0.44905	0.263845	0.311479	0.0244286	0.165757	0.228968	0.315471	0.583297	-0.217812	-0.0402514	-0.18871	-0.17358	0.0347563	0.311418	0.0342364	0.382375	1	0.501762	0.373966	0.325281	0.261066	0.146075	0.328081	0.141613	0.485112	0.375011	0.364024	0.260125	0.147733	0.41654	0.282196	0.385706	0.196212	0.0973313	0.281989	0.0651879
Parvimonas micra	0.332544	0.332248	0.646863	0.362638	0.274387	0.380742	0.71891	0.466762	0.169348	0.027524	0.487613	0.541368	0.714281	-0.0591066	0.164881	0.378887	0.527645	0.462319	-0.429236	-0.228814	-0.269404	-0.412999	-0.145762	0.741572	0.509486	0.520346	0.501762	1	0.325409	0.491431	0.492805	0.089382	0.417268	0.497721	0.347235	0.65054	0.388423	0.415562	0.336312	0.314514	0.681498	0.405288	0.684651	0.0231052	0.193877	0.0305788
Peptostreptococcus	0.132013	0.485977	0.282086	0.249353	0.0804282	0.0343831	0.095334	0.157557	-0.0593369	-0.0331334	0.33612	0.165377	0.12673	0.260336	0.1996	0.32102	0.250645	0.357761	-0.187974	-0.0200804	-0.0973221	-0.134927	0.0645265	0.182006	0.00804788	0.15742	0.373966	0.325409	1	0.328246	0.262648	0.334515	0.320149	0.093716	0.505771	0.246329	0.480931	0.155773	0.131361	0.449233	0.31356	0.270122	0.195429	0.229864	0.29049	0.236029
Porphyromonas	0.102093	0.163996	0.245377	0.741707	0.0189709	0.486567	0.32307	0.515207	0.294931	0.028676	0.214611	0.195971	0.273869	-0.00965276	0.191335	0.434772	0.145436	0.263332	-0.236998	-0.0918872	-0.213013	-0.211678	0.0726262	0.375557	0.206725	0.381391	0.325281	0.491431	0.328246	1	0.465286	0.340395	0.431299	0.277114	0.127088	0.308216	0.245644	0.456403	0.315999	0.212357	0.333508	0.472251	0.3516	0.124258	0.34078	0.0180874
Porphyromonas asaccharolytica	0.126139	0.0952764	0.352621	0.257102	0.139006	0.282666	0.490143	0.319196	0.0433799	0.0659783	0.211401	0.310652	0.396821	0.00211218	0.157039	0.416577	0.252086	0.185691	-0.282957	-0.0608807	-0.274802	-0.250488	-0.0275555	0.49817	0.294209	0.348517	0.261066	0.492805	0.262648	0.465286	1	0.34252	0.300273	0.29415	0.207843	0.543302	0.510828	0.276395	0.21064	0.179746	0.598037	0.389784	0.342392	0.0429559	0.363731	0.0291048
Porphyromonas bennonis	-0.101136	-0.0194597	-0.0485095	0.127234	0.0696035	0.0472358	-0.0407615	0.062057	0.0466877	0.024175	-0.0305619	0.0285633	-0.0810606	0.195499	0.0519734	0.0567643	-0.0256292	0.0267007	0.0166055	0.159271	-0.0102505	0.0469414	0.425897	0.00302538	0.0180206	0.263238	0.146075	0.089382	0.334515	0.340395	0.34252	1	0.308762	0.0750944	0.0766201	0.265628	0.243266	0.199875	0.29299	0.206683	0.155496	0.300883	0.0540289	0.364517	0.437179	0.24843
Prevotella	0.125413	0.107751	0.231833	0.365985	0.0797137	0.286732	0.248813	0.219046	0.183641	-0.0168635	0.344712	0.295878	0.287842	0.0443616	0.162463	0.134932	0.224722	0.17054	-0.251008	-0.063342	-0.218704	-0.219543	0.0320434	0.327606	0.32456	0.469799	0.328081	0.417268	0.320149	0.431299	0.300273	0.308762	1	0.208167	0.166422	0.400855	0.193697	0.434898	0.23291	0.23856	0.368121	0.287661	0.417103	0.122542	0.272093	0.078194
Prevotella amnii	0.190217	0.0887263	0.466429	0.243756	-0.00942542	0.393559	0.547066	0.444136	0.30801	0.0537528	0.24682	0.506522	0.566642	-0.0685682	0.0302737	0.176594	0.411195	0.095746	-0.355022	-0.200223	-0.129908	-0.371487	-0.117843	0.582788	0.548274	0.348921	0.141613	0.497721	0.093716	0.277114	0.29415	0.0750944	0.208167	1	-0.02823	0.242924	0.0110648	0.399008	0.274445	0.0119606	0.386207	0.10153	0.628455	0.0572286	0.00345989	0.0760451
Prevotella bivia	0.340399	0.458148	0.436604	0.00996492	0.241001	-0.0304233	0.129813	-0.0269827	-0.0421095	-0.114911	0.564983	0.276183	0.32722	0.221188	0.20982	0.128635	0.406637	0.532803	-0.320299	-0.0580473	-0.155293	-0.210314	-0.0660404	0.228916	0.112834	0.0844725	0.485112	0.347235	0.505771	0.127088	0.207843	0.0766201	0.166422	-0.02823	1	0.335245	0.418746	0.0387786	0.0584918	0.377369	0.380483	0.283932	0.140399	0.137336	0.237125	0.205336
Prevotella buccalis	0.29607	0.246156	0.484615	0.146444	0.212068	0.148018	0.558101	0.210471	0.043142	0.0342346	0.425857	0.561309	0.51812	0.0753721	0.0530053	0.187755	0.431036	0.336238	-0.315246	-0.129783	-0.317228	-0.284815	-0.0355158	0.542935	0.431108	0.393407	0.375011	0.65054	0.246329	0.308216	0.543302	0.265628	0.400855	0.242924	0.335245	1	0.446024	0.118297	0.3437	0.26624	0.784262	0.381792	0.467527	0.0591213	0.274522	0.0497373
Prevotella disiens	0.193628	0.310604	0.345643	0.158833	0.286795	0.0398956	0.2246	0.0436844	-0.0604309	0.0640852	0.320368	0.262779	0.236679	0.068457	0.164036	0.233057	0.251108	0.210518	-0.227107	-0.0369277	-0.185428	-0.162043	-0.00780489	0.254879	0.108228	0.172414	0.364024	0.388423	0.480931	0.245644	0.510828	0.243266	0.193697	0.0110648	0.418746	0.446024	1	0.0545054	0.158233	0.312155	0.507191	0.350614	0.122512	0.131435	0.361153	0.124764
Prevotella genogroup 3	0.118189	0.17254	0.20704	0.46108	0.140127	0.644748	0.362385	0.546803	0.380768	0.0382815	0.261449	0.311395	0.353902	0.0315992	0.0276079	0.07597	0.219635	0.195966	-0.259503	-0.0936666	-0.127948	-0.239951	-0.0128001	0.494575	0.402352	0.520564	0.260125	0.415562	0.155773	0.456403	0.276395	0.199875	0.434898	0.399008	0.0387786	0.118297	0.0545054	1	0.361145	0.100647	0.217982	0.141285	0.514585	0.122523	0.106775	0.0620275
Prevotella genogroup 4	0.177805	0.138459	0.22074	0.234031	0.0132865	0.156088	0.333567	0.29775	0.0971906	0.0444967	0.191008	0.40556	0.219186	0.0138321	0.00658452	0.0696105	0.221389	0.0864486	-0.14575	-0.037525	-0.1272	-0.10048	0.114821	0.324669	0.246888	0.471811	0.147733	0.336312	0.131361	0.315999	0.21064	0.29299	0.23291	0.274445	0.0584918	0.3437	0.158233	0.361145	1	0.178624	0.341548	0.177328	0.257545	0.190267	0.239296	0.126863
Prevotella melaninogenica	0.166637	0.232403	0.20616	0.0936598	0.192902	-0.0521916	0.133652	0.0389765	0.0160295	-0.0538839	0.290198	0.149203	0.176976	0.188965	0.209593	0.170391	0.15848	0.348927	-0.1551	0.00324434	-0.152948	-0.0942005	0.0862409	0.193212	0.0619024	0.209043	0.41654	0.314514	0.449233	0.212357	0.179746	0.206683	0.23856	0.0119606	0.377369	0.26624	0.312155	0.100647	0.178624	1	0.203947	0.445622	0.209403	0.263902	0.402311	0.283315
Prevotella timonensis	0.38665	0.394862	0.619516	0.246564	0.188455	0.23661	0.684104	0.342626	0.124025	-0.00746095	0.5036	0.676049	0.656361	0.13065	0.0595803	0.311691	0.589056	0.292846	-0.453075	-0.202325	-0.285939	-0.401835	-0.172244	0.638832	0.56103	0.359789	0.282196	0.681498	0.31356	0.333508	0.598037	0.155496	0.368121	0.386207	0.380483	0.784262	0.507191	0.217982	0.341548	0.203947	1	0.345507	0.558285	0.0352235	0.160246	0.0585076
Sneathia	0.0381474	0.111287	0.187133	0.237586	0.356516	0.0259053	0.184379	0.101196	0.069918	0.0415398	0.195546	0.102124	0.211276	-0.0193128	0.218096	0.289553	0.0836842	0.327421	-0.133386	0.0125892	-0.230626	-0.0993015	0.158654	0.262382	0.147167	0.173229	0.385706	0.405288	0.270122	0.472251	0.389784	0.300883	0.287661	0.10153	0.283932	0.381792	0.350614	0.141285	0.177328	0.445622	0.345507	1	0.220318	0.184323	0.502309	0.134405
Sneathia sanguinegens	0.255259	0.158164	0.529386	0.364546	0.0669709	0.443025	0.632595	0.503258	0.224356	0.0162276	0.404707	0.519545	0.688836	-0.01442	-0.00964801	0.241537	0.455691	0.214166	-0.417306	-0.215278	-0.225219	-0.412883	-0.14739	0.806431	0.65613	0.423425	0.196212	0.684651	0.195429	0.3516	0.342392	0.0540289	0.417103	0.628455	0.140399	0.467527	0.122512	0.514585	0.257545	0.209403	0.558285	0.220318	1	0.0318476	0.0360395	0.0885516
Streptococcus mitis/oralis	0.0236728	0.0483456	-0.0910785	0.0452904	0.0385412	-0.0590267	-0.0846219	-0.0457996	0.0157078	0.00697165	-0.00201439	-0.0312714	-0.0926596	0.187107	0.221724	0.0559423	0.00651689	0.0923389	-0.0635742	0.08567	-0.0286292	-0.0288099	0.186639	0.000622777	-0.0847392	0.12023	0.0973313	0.0231052	0.229864	0.124258	0.0429559	0.364517	0.122542	0.0572286	0.137336	0.0591213	0.131435	0.122523	0.190267	0.263902	0.0352235	0.184323	0.0318476	1	0.38886	0.452012
Sutterella wadsworthensis	-0.126663	-0.0316637	-0.012357	0.0935368	0.0779161	-0.0299031	0.0528082	-0.0326925	0.0547373	0.0526219	0.0398714	-0.0104254	-0.0438453	0.0849281	0.424068	0.206136	-0.0752454	0.24307	-0.0199611	0.129564	-0.142369	-0.0140208	0.276408	0.100617	0.0421428	0.132212	0.281989	0.193877	0.29049	0.34078	0.363731	0.437179	0.272093	0.00345989	0.237125	0.274522	0.361153	0.106775	0.239296	0.402311	0.160246	0.502309	0.0360395	0.38886	1	0.178347
Veillonella montpellierensis	0.248326	0.206846	0.105198	0.0317465	0.0228479	-0.0899322	-0.0677675	-0.0501953	0.0446639	-0.04484	0.209935	0.0709406	0.0704186	0.248634	0.040985	0.0413928	0.204772	0.128715	-0.091706	0.158417	0.0637754	0.00804897	0.15091	0.0603333	-0.051737	0.108967	0.0651879	0.0305788	0.236029	0.0180874	0.0291048	0.24843	0.078194	0.0760451	0.205336	0.0497373	0.124764	0.0620275	0.126863	0.283315	0.0585076	0.134405	0.0885516	0.452012	0.178347	1
