# Supplementary material for: Bacterial Communities in Women with Bacterial Vaginosis: High Resolution Phylogenetic Analyses Reveal Relationships of Microbiota to Clinical Criteria
Source: PLoS One. 2012 Jun 18;7(6):e37818. doi: 10.1371/journal.pone.0037818 (PMC3377712; doi:10.1371/journal.pone.0037818)
Supplement: Table S9 — Association of bacteria with Amsel’s clinical criteria. (XLSX) [file pone.0037818.s012.xlsx]

## Sheet: taxonomic-determinants
Bacterial Taxa	Regression co-efficient
Amsel Diagnosis
Eggerthella sp. type 1	0.184
Gardnerella vaginalis	0.118
BVAB2	0.108
Leptotrichia amnionii	0.086
Prevotella disiens	0.084
Lactobacillus crispatus	-0.046
Elevated pH
Gardnerella vaginalis	0.0522
Lactobacillus crispatus	-0.0423
Atopobium vaginae	0.0331
Leptotrichia amnionii	0.0253
Dialister micraerophilus	0.0209
Prevotella bivia	0.0144
Mycoplasma hominis	0.0049
Porphyromonas asaccharolytica	0.0039
Eggerthella sp. type 1	0.003
Positive Whiff Test
Dialister micraerophilus	0.159
Prevotella buccalis	0.1308
Leptotrichia amnionii	0.129
Gardnerella vaginalis	0.1286
Eggerthella sp. type 1	0.1228
BVAB1	0.0672
Parvimonas micra	0.0271
Porphyromonas asaccharolytica	0.0216
Prevotella bivia	0.0154
Prevotella disiens	0.0066
Lactobacillus crispatus	-0.0034
Presence of Clue Cells
Eggerthella sp. type 1	0.2637
Gardnerella vaginalis	0.1325
BVAB2	0.11018
Dialister sp. type 2	0.0438
Megasphaera sp. type 1	0.02809
Leptotrichia amnionii	0.02701
Lactobacillus crispatus	-0.02206
Atopobium vaginae	0.00058
Abnormal Vaginal Fluid
Atopobium vaginae	0.1932
Leptotrichia amnionii	0.0905
Eggerthella sp. type 1	0.0795
Prevotella timonensis	0.0392
Lactobacillus crispatus	-0.0369
Parvimonas micra	0.0068
